# Supplementary material for: Pycallingcards: an integrated environment for visualizing, analyzing, and interpreting Calling Cards data
Source: PubMed Central journal article supplement (PMC10881108; doi:10.1093/bioinformatics/btae070), 2024-02-07
Supplement: btae070_supplementary_data.pdf [file btae070_supplementary_data.pdf]

# Methods

## Package design

We aimed to create a user-friendly and extensible platform for the reading, preprocessing, analyzing, and visualization of CC data. Pycallingcards takes as input a text file containing mapped transposon insertions (in qbed format (Moudgil et al., 2021)) and calls peaks, annotates them, finds TF motifs over-represented near binding sites, performs differential peak analysis, enables the comparison of TF binding and RNA expression, allows for the intersection of disease-associated loci found in GWAS with peak calls, and lets the user visualize each step in this process. Pycallingcards is organized into five submodules: the Datasets submodule, which contains several exemplar CC datasets; the Reading submodule, which allows for the reading, writing, and merging of different file formats (e.g. qbed, barcode files, RNA-seq data files, etc); the Preprocessing submodule which contains functions to clean qbed files, call TF binding peaks, and annotate them; the Tools submodule, which contains tools for the downstream analysis of CC peaks such as differential peak calling, integration with RNA-seq data, TF footprint identification, comparison with ChIP-seq data, and integration with GWAS datasets; and the Plotting submodule, which enables visualization of calling card insertions and integration with the WashU epigenome browser to produce publication-ready figures. This submodule also provides methods for the visualization of the different downstream analyses performed by the Tools submodules.

Pycallingcards builds on the Anndata (Wolf, Angerer, & Theis, 2018) and Mudata (Bredikhin, Kats, & Stegle, 2022) objects that are widely used for the analysis of single cell data. For CC data, Pycallingcards creates a cells/samples-by-peaks matrix which allows the user to interact with different multi-omics analysis tools. The Anndata object includes a table for peaks that stores peak annotation information, a table for cells or samples that indicate types, and a matrix that stores binding information. Other results (e.g. differential peaks calls) can also be stored in this object. For integrated multi-omic analysis, Pycallingcards combines the two Anndata objects that hold CC and RNA-seq data into a single Mudata object. This facilitates the discovery of TF binding events that are correlated with gene expression and allows the user to correlate binding and gene expression with SNP and GWAS information, which is typically contained in pandas data frames and saved to the Anndata or Mudata objects.

## Peak calling

Pycallingcards supports three different peak calling methods, CCcaller, MACCs, and an optimized version of Blockify. These methods identify regions in the genome for which there are significantly more TF-directed insertions than background (PBase) insertions. The peak calling workflows for CCcaller and MACCs are shown in Fig 2a and 2b. The Blockify algorithm is described in detail elsewhere (Moudgil et al., 2020). CCcaller and MACCs each have three steps and only differ in the first one. In the first step, CCcaller identifies candidate TF binding sites by considering a candidate peak at the first insertion on each chromosome and extending the width of the candidate peak to include other insertions until there are no insertions nearby. In contrast, MACCs, which is modeled after the popular ChIP-Seq analysis programs MACS and MACS2, uses a sliding window to identify candidate peaks, starting at the first TF-directed insertion on a chromosome. The second step in both algorithms is testing whether there are significantly more TF-directed insertions than background insertions in this potential area by applying the Poisson test using a lambda value parameterized from insertion density in the surrounding area (optionally with user-specified pseudocounts). The definition of p-value here is similar to MACS2 (Y. Zhang et al., 2008). More precisely, we estimate the number of insertion numbers  $In_i$  and the number of TTAA sites  $T_i$  in the surrounding area whose length is defined by `lam_win_size`. We then calculate the number of insertions  $in_i$  and the number of TTAA sites  $t_i$  in this potential area. The expected number of insertions  $\lambda_i$  in this potential area is  $\frac{In_i * t_i}{T_i} + pseudocounts$ , Poisson test is tested on  $in_i + pseudocounts$  to find out if it is a peak or not. For MACCs, if significance is achieved and the window is extended by a user-specified step size, the test is repeated until the candidate peak can no longer be extended. Finally, the algorithms then compare the experimental data to the density of background insertions around the peak, while adjusting for TTAA density. To determine significance, a Poisson test similar to that described above is performed to test whether the CC insertions under the peak are at a significantly higher density than expected from the background data. MACCs then centers the final peak coordinates on the distribution of insertions. For experiments where no background data is available, both CCcaller and MACCs support background-free peak calling. The algorithms scan through the genome in the same manner as described above, but the null models are parameterized by the average insertion density in a large window centered on the candidate peak (after adjusting for relative TTAA densities in the two windows). In this manner, regions with high local densities of insertions are identified. When calling peaks, we treat insertions as

independent events and only record the start point of insertions. This allows us to reduce the time complexity of the algorithm to  $O(n)$  if the qbed data is sorted, substantially reducing the number of computing resources needed.

## Footprint analysis

Pycallingcards provides functionality to compute TF footprints, which is useful for the analysis of yeast CC data, which, unlike mammalian CC data, has single nucleotide resolution. By analyzing the pattern of insertions in the yeast genome, one can often precisely estimate the binding site of the TF. This is accomplished using a Gaussian mixture model. This model assumes that distributions of insertions to the left and right of a binding site follow two independently parameterized Gaussian distributions:  $r_i$  represents the data from the right distribution and  $l_i$  represents the data from the left distribution where  $r_i \sim N(r, \mu_r, \sigma_r) = \frac{1}{\sigma_r \sqrt{2\pi}} e^{-\frac{(r-\mu_r)^2}{\sigma_r^2}}$  and  $l_i \sim N(l, \mu_l, \sigma_l) = \frac{1}{\sigma_l \sqrt{2\pi}} e^{-\frac{(l-\mu_l)^2}{\sigma_l^2}}$  where  $\mu_r \neq \mu_l$ . Combining the two Gaussian distributions, the equation becomes:  $p(x | \mu_r, \mu_l, \sigma_r, \sigma_l, \pi_r, \pi_l) = \pi_r N(x, \mu_r, \sigma_r) + \pi_l N(x, \mu_l, \sigma_l)$ .

The parameters of the model are then estimated by expectation-maximization (EM) (McLachlan & Krishnan, 2007). EM is a two-step iterative algorithm that alternates between performing an expectation step, where expectations for each data point are computed based on current parameter estimates by  $p_{ic} = \frac{\pi_c N(x_i | \mu_c, \sigma_c)}{\pi_r N(x_i | \mu_r, \sigma_r) + \pi_l N(x_i | \mu_l, \sigma_l)}$ ,  $c \in r, l, i \in 1, \dots, n$ ,  $n$  is the total number of data in the peak. In the maximization step, we update  $\mu_r, \mu_l, \sigma_r, \sigma_l$  based on the maximum likelihood estimate. After the algorithm converges,  $\mu_r, \mu_l$  are found and we report the area between the mean values of each distribution as the true binding site.

## Signal calculation

In order to compare the signal of CC data with other reference sequences, eg Chip-seq, Cut & Run data, Pycallingcards, calculate a running average of the signal around the peak. The default settings use a 20000 bp window centered on the peak with a bin size of 100.

## Motif analysis

HOMER (Heinz et al., 2010) is utilized for motif analysis in Pycallingcards. It incorporates a unique motif discovery technique aimed at genomics applications including regulatory element analysis. It is a differential motif discovery method, which attempts to uncover regulatory components that are disproportionately abundant in one set of sequences compared to the other. Motif enrichment is determined by combining zero or one occurrence per sequence (ZOOOPS) score, with hypergeometric enrichment calculations. HOMER gives a rank of all of the motifs and finds the most significant binding motifs.

## Annotation

Pycallingcards uses Bedtools (Quinlan & Hall, 2010) to find the two closest genes to each called peak. The closest function in Bedtools searches for overlapping areas in the peaks and reference data. In the event that no feature in reference gene overlaps the peaks, closest will report the nearest (that is, least genomic distance from the start or end of peaks) gene (Quinlan & Hall, 2010). After the peaks are annotated, the information is stored in an Anndata object, for cells/groups-by-peaks  $X_{n \times p}$ ,  $n$  represents the number of cells/groups and  $p$  indicates the number of peaks, which is produced by CC data and peak data.

## Differential peak analysis

The goal of differential peak analysis is to compare TF binding sites across two samples and find peaks where there is significantly more binding in one sample than in the other. This can be challenging as two samples may have slightly shifted peak centers at a given genomic region, leading to false positive differential peak calls. Pycallingcards employs two different strategies to address this problem. In the first strategy, the two samples to be compared are combined and peaks are called on the joint dataset. Next, a Fisher's exact test or binomial test is utilized to determine if the number of insertions under each peak from one sample is significantly different the number of insertions under the peak from the other sample. In the second strategy, peaks are called separately for each sample and overlapping peaks

are combined between samples and then significance tests are performed on the combined peaks exactly as before. To better illustrate this process, Fig.3 shows the workflow of the analysis.

When analyzing scCC data, one is generally interested in identifying cell-type specific binding. Thus, Pycallingcards computes the probability that the TF binding in one cell type is significantly higher than in the average of all other cell types; as such, one-sided tests are used. For example, when using Fisher's exact test, for each peak and each cell type we have the variables  $c_A$  (number of cells in the peak of the specific cell type),  $c_B$  (number of cells in the peak of the rest of cell types),  $n_A$  (number of cells in the other peaks of the cell types),  $n_B$  (number of cells in the other peaks of the rest cell types). The probability of each circumstance is  $p = \frac{(c_A+c_B)!(n_A+n_B)!(c_A+n_A)!(c_B+n_B)!}{c_A!c_B!n_A!n_B!(c_A+c_B+n_A+n_B)!}$ . The null hypothesis is that the expected number of TF-directed insertions in the cell type of interest is the same as the expected number of TF-directed insertions in the other types. In the binomial test, for each peak and each type, we have  $i_A$  (number of insertions in the peak of type),  $i_B$  (number of insertions in the peak of the rest cell types),  $t_A$  (number of cells in all the peaks of the types), and  $t_B$  (number of cells in all the peaks of the rest cell types). Under the null hypothesis, the probability of insertion number in the peak of type  $p(k) = \binom{k}{i_A+i_B} \left(\frac{t_A}{t_A+t_B}\right)^k \left(1 - \frac{t_A}{t_A+t_B}\right)^{i_A+i_B-k}$ . We assume that the insertions capture the same ratio of cell numbers.

When analyzing bulk CC data, one is usually most interested in finding peaks that are differentially bound between two samples that represent different treatments, cell types, or time points. As a result, two-sided tests are used for differential peak calling for bulk CC data. For example, when using the Fisher's exact test, for each peak and each group we have the variables  $i_A$  (number of insertions in the peak of the group),  $i_B$  (number of insertions in the peak of the other group),  $n'_A$  (number of insertions in the other peaks of the group), and  $n'_B$  (number of insertions in the other peaks of the other group). The probability of each circumstance is  $p = \frac{(i_A+i_B)!(n'_A+n'_B)!(i_A+n'_A)!(i_B+n'_B)!}{i_A!i_B!n'_A!n'_B!(i_A+i_B+n'_A+n'_B)!}$ . Here, the null hypothesis is that the expected number of TF-directed insertions under the peak in one sample is the same as the expected number of TF-directed insertions in the other types. In the binomial test, for each peak and each group,  $t_A$  (number of insertions in all the peaks of the group), and  $t_B$  (number of insertions in all the peaks of the rest group). Under the null hypothesis, the probability of insertions number in the peak of group  $p(k) = \binom{k}{i_A+i_B} \left(\frac{t_A}{t_A+t_B}\right)^k \left(1 - \frac{t_A}{t_A+t_B}\right)^{i_A+i_B-k}$ . We assume that the insertions should capture the same ratio of total insertion numbers.

After all the tests are completed for each peak for one group/cell type, Benjamini-Hochberg correction (Thissen, Steinberg, & Kuang, 2002) is followed to calculate the adjusted p-value.

## Pair analysis

Pycallingcards can group peaks that are bound in a cell-type specific manner to nearby genes that are expressed in a cell type specific manner, which then become peak-gene pairs. This functionality is useful for exploring the transcriptional consequences of TF binding.

For scCC data, peaks for which binding is significantly enriched in one cell types are paired with genes significantly expressed in the same cell type using the `pair_peak_gene` function, which takes as input a specific cell type (or groups of cell types), (adjusted) p-value cutoffs, and log fold change cutoffs for both the differential gene analysis and differential peak analysis. If the peak and the annotated gene are significant, they are annotated as matched peak-gene pairs.

## GWAS analysis

Pycallingcards also provides functionality to determine whether significantly bound peaks are near SNPs associated to disease in a GWAS study. In GWAS analysis, all SNP data are downloaded from the GWAS Catalog (<https://www.ebi.ac.uk/gwas/docs/file-downloads>) and are stored by cell type/group. First, a peak by SNP sparse matrix  $D_{p*s}$  is created, where p is the number of peaks and d is the number of SNPs recorded.  $X_{n*s}$  is the cells/groups/samples-by-peaks matrix from the Anndata object. The cell/group/samples by SNP matrix  $S_{n*s} = X_{n*s}D_{p*s}$  is then found. For scCC data, cells from the sample cell type are added together. When plotted,  $S_{n*s}$  is divided by the total number of cells and normalized by a single SNP. Additionally, Pycallingcards also provides functionality to output all SNPs (and their associated annotations) that are under or near a set of user-specified peaks.

## Connection to WashU Epigenome Browser

Pycallingcards provides functionality to visualize CC and peak data directly in the WashU Epigenome Browser (Li, Hsu, Purushotham, Sears, & Wang, 2019; Li et al., 2022). CC data is in qbed format (Moudgil et al., 2020) and TF directed insertions and a track displaying the density of insertions can be visualized in the Epigenome browser by

supplying files in qbed and bedgraph formats respectively. Pycallingcards provides the function WashU\_browser\_url to sort and compress and index these files. Pycallingcards then converts the density bedgraph file to bigwig format by UCSC Kent bedGraphToBigWig utility (Kent, Zweig, Barber, Hinrichs, & Karolchik, 2010). WashU Epigenome Browser handles all file processing and hosting and Pycallingcards generates a datahub.json for WashU Epigenome Browser and returns a 24h-valid link to WashU Epigenome Browser for all visualization. The codes are available on Github.

## Bulk Calling Cards data Generation

In order to compare the performance of different methods, we generated a large Brd4 CC data collected from K562 cells.

### In vitro bulk calling card experiments

The K562 cell line was cultured in RPMI medium containing 10% FBS and penicillin-streptomycin.  $2 \times 10^6$  cells were transfected with 5ug of donor Barcoded-PBase-SRT-Puro and 5ug helper (hyPBase or hyPBase-centrip) using the Neon electroporation system for a total of 30 replicates. For a negative control, one replicate of K562 cells was transfected with 5ug Barcoded-PBase-SRT-Puro plasmid only. We used the following settings-pulse voltage: 1, 450 V; pulse width: 10 ms; pulse number: 3. After transfection, three replicates were plated into a 10 cm dish. Cells were grown under 2ug/ml puromycin selection for 11 days, by which time almost all negative control transfectants were dead. After 11 days, each replicate was dissociated into a single-cell suspension with 0.25% trypsin-EDTA and resuspended in PBase. Aliquots of each replicate were cryopreserved in culture media supplemented with 5% DMSO. The remaining cells were pelleted by centrifugation at 300 g for 5 minutes. Cell pellets were either processed immediately or kept at  $-80^{\circ}\text{C}$  in RNAProtect Cell Reagent.

### Isolation and RT of bulk RNA

Total RNA was isolated from every three replicates using the RNEasy Plus Mini Kit following manufacturer's instructions and as described in ((Moudgil et al., 2020)). RNA was eluted in 40 ul RNase-free water and quantified using the Qubit RNA HS Assay Kit.

We performed first strand synthesis on each replicate with Maxima H Minus Reverse Transcriptase. We mixed 2ug of total RNA with 1ul of 10mM dNTPs and 1ul of 50uM SMART\_dT18VN primer, brought the total volume up to 14ul, and incubated it at  $65^{\circ}\text{C}$  for 5 minutes. After a 1 minute incubation on ice, we added 4ul X Maxima RT Buffer, 1ul RNaseOUT, and 1ul of Maxima H Minus Reverse Transcriptase. The solution was mixed by pipetting and incubated at  $50^{\circ}\text{C}$  for 1 hour followed by heat inactivation at  $85^{\circ}\text{C}$  for 10 minutes. cDNA was stored at  $-20^{\circ}\text{C}$ .

### Amplifying self-reporting transcripts from RNA

The PCR conditions for amplifying self-reporting transcripts (i.e., transcripts derived from self-reporting transposons) involved mixing 1ul cDNA template with 12.5ul Kapa HiFi HotStart ReadyMix, 0.5ul 25uM SMART primer, and 1ul of 25uM SRT\_PAC\_F1 primer. The mixture was brought up to 25ul with ddH2O. Thermocycling parameters were as follows:  $95^{\circ}\text{C}$  for 3 minutes; 20 cycles of:  $98^{\circ}\text{C}$  for 20 s –  $65^{\circ}\text{C}$  for 30 s –  $72^{\circ}\text{C}$  for 5 minutes;  $72^{\circ}\text{C}$  for 10 minutes; hold at 4C forever. As a control, cDNA quality can be assessed with exon-spanning primers for b-actin under the same thermocycling settings.

PCR products were purified using AMPure XP beads. 15ul(0.6X) resuspended beads were added to the 25ul PCR product and mixed homogenously by pipetting. After a 5 minute incubation at room temperature, the solution was placed on a magnetic rack for 2 minutes. The supernatant was aspirated and discarded. The pellet was washed twice with 200ul of 80% ethanol (incubated for 30 s each time), discarding the supernatant each time. The samples were briefly spun down and the tubes were placed against a magnetic rack; the final few drops of supernatant wer then removed with a p10 pipette. Next, 20ul dddH2O was added to the beads and DNA was resuspended by pipetting. The slurry was incubated at room temperature for 2 minutes, and placed on a magnetic rack for one minute. Once clear, the supernatant was transferred to a clean 1.5 mL tube. DNA concentration was measured on the Qubit 3.0 Fluorometer using the dsDNA High Sensitivity Assay Kit.

## Generation of bulk RNA calling card libraries

Calling card libraries from bulk RNA were generated using the Nextera XT DNA Library Preparation Kit. 1ng of PCR product was resuspended in 5 $\mu$ l nuclease-free water. To this mixture, we added 10 $\mu$ l Tagment DNA (TD) Buffer and 5 $\mu$ l Amplicon Tagment Mix (ATM). After pipetting to mix, we incubated the solution in a thermocycler preheated to 55°C. The tagmentation reaction was halted by adding 5 $\mu$ l Neutralize Tagment (NT) Buffer and was kept at room temperature for 5 minutes. The final PCR was set up by adding 15 $\mu$ l Nextera PCR Mix (NPM), 8 $\mu$ l H<sub>2</sub>O, 1 $\mu$ l of 10mM transposon primer (e.g., OM-PBase-NNN-Index2) and 1 $\mu$ l Nextera N7 index1 primer. The final PCR was run under the following conditions: 95°C for 30 s; 13 cycles of: 95°C for 10 s – 50°C for 30 s – 72°C for 30 s; 72°C for 5 minutes; hold at 4°C forever. After PCR, the final library was purified using 30 $\mu$ l (0.6x) AMPure XP beads, as described above. The library was eluted in 11 $\mu$ l ddH<sub>2</sub>O and quantitated on an Agilent TapeStation 4200 System using the High Sensitivity D1000 Screentape.

## Sequencing and analysis

The libraries were sequenced on an Illumina NovaSeq 6000.

## Data analysis

A custom nf-core/callingcards pipeline nf-core/callingcards pipeline was built using Nextflow(?, ?), to provide a portable pipeline for the community. Briefly, the fully containerized pipeline takes in raw fastq files as input and parses the SRT barcodes, trims the adapters, aligns to a reference genome, and generates a resulting qBED file, which can be used directly as input into Pycallingcards.

To benchmark the peak calling performance, we conducted a benchmark test with a sample size ranging from 10,000 to 20 million insertions. This range was chosen as it reflects the scope of standard experiments, and it also accounts for the detection of weaker binding signals when a large number of insertions are gathered, necessitating the application of non-typical p-value thresholds.

Additionally, HOMER 4.11 is used for motif calling.

# 1 Notes

## 1.1 Results for Mouse Cortex Calling Cards data

Here we provide supplemental information about our analysis of the Mouse Cortex Calling Cards(CC) data. Table 1 shows the final results for mouse cortex data after preprocessing, differential peak analysis, pair analysis, and GWAS analysis. Each column contains information on the cluster, peak information, gene information, the locus that peaks mapped to hg38, the gene locus that mapped to hg38, and the GWAS published results of the mapped peak area. For example, the peak chr16:43501178...43518253 is significantly expressed in Astrocytes (Logfoldchange = 3.077262 and adjusted p-value = 3.297735e-14) and potentially regulates the gene Zbtb20 (score of 79.234276 and adjusted p-value = 0.000000e+00). In humans, Zbtb20 is encoded at hg38(chr3:114314499...115147280) and the binding peak is at hg38, chr3:114439800...114457200. In this genomic region, single nucleotide variants (SNVs) have been identified through GWAS as being significantly associated with several key phenotypes, including Schizophrenia, smoking status (distinguishing between ever and never smokers), smoking initiation, and vertex-wise sulcal depth. Further analysis of the GWAS database revealed distinct cell types exhibiting differentially bound peaks in proximity to these GWAS-associated SNVs (see Fig 1). Notably, a considerable number of SNVs, which show associations with intelligence-related outcomes such as cognitive ability, intelligence, attention deficit hyperactivity disorder (ADHD), and autism spectrum disorder — a phenomenon indicative of pleiotropy — are situated near neuron-specific Brd4 binding peaks. This analysis provides a testable hypothesis about a potentially crucial role of this variant in influencing Zbtb20 gene regulation which in turn could affect a diverse range of cognitive abilities and disorders.

## 1.2 Results for Bulk Glioblastoma Calling Cards data

Enhancers differentially bound by Brd4 in female and male mouse glioblastoma (GBM) cells(Kfoury et al., 2021) are shown in Table 3. A log fold change larger than 0 corresponds to increased Brd4 binding in female cells. Tables 4 and 5 report DNA motifs that were significantly enriched in male-bound or female-bound enhancers respectively. To find these motifs, differentially bound peaks were first filtered (adjusted p-value  $\leq 0.05$ , log fold change  $\geq 3$ ) and then HOMER was utilized to call motifs separately. Motifs with p-value  $\leq 0.05$  are reported.

Motifs for three TF families were enriched in female-specific Brd4 peaks: IRF, ETS, MADS. The IRF family, particularly IRF5, has previously been implicated in mediating sex differences in immune responses. Higher levels of IRF5 in females were found to be correlated with increased production of specific cytokines like IFN- $\alpha$  and TNF- $\alpha$ , underlining the importance of considering sex differences in immune response studies and potential therapeutic approaches (Griesbeck et al., 2015; Beisel et al., 2023; Andrienas et al., 2018). In addition, the interaction between the IRF (Interferon Regulatory Factor) motif family and Brd4 (Bromodomain-containing protein 4) is supported by a previous study investigating IRF8's role in regulating the transcription of Naip genes, which are critical for the activation of the NLRC4 inflammasome. This work showed that Brd4 collaborates with IRF8 and PU.1 to regulate gene transcription. ChIP-seq and qPCR analyses revealed the enrichment of Brd4, IRF8, PU.1, and RNAPII at the promoters of Naip2 and Naip5/6. The binding of Brd4 to these promoters is IRF8-dependent, and mutations in the IRF8 or PU.1 binding motifs disrupt the formation of these transcriptional complexes, underscoring the essential role of these motifs in recruiting Brd4 to the promoters to facilitate Naip gene transcription(Dong et al., 2021). These studies support the idea that IRF TFs are involved in establish sex differences in a Brd4 mediated manner, and our results suggest that further investigations into the role of these TFs in GBM is warranted. MADS-box genes have been implicated in plant sex determination (X. Zhang et al., 2023; Fatima et al., 2020), so there is some weak support in the literature for our observations. The ETS family has not previously been implicated in playing a role in sex differences. Further experimentation will be required to ascertain the roles of these two TF families in establishing sex differences(Grant, Wang, Kumari, Zabet, & Schalkwyk, 2022; Okada et al., 2011).

One motif of interest that was found to be enriched in male-specific Brd4 bound enhancers is the SRY motif. In mammals, particularly humans, the SRY (sex-determining region Y) transcription factor plays a crucial role in male sex determination by activating transcription of genes critical for male development (Weiss, 2005). Thus an intriguing possibility raised by these results is that a portion of the transcriptional differences between male and female GBM cells can be traced back to the sex-determining transcription factor SRY.

### 1.3 Results for yeast Calling Cards data

MACCs peak calling provides a more elegant method for analysis of *Saccharomyces cerevisiae* CC data that is independent of genome feature annotations. CC data for TFs in *Saccharomyces cerevisiae* has heretofore been analyzed by calculating a statistical enrichment of Ty5 insertions in intergenic regions, which were annotated as sequences between ORFs that are less than 5kb in length; this analysis ignored non-protein coding genes and other genomic features. This analysis method also gave no indication of binding peak size. Pycallingcards also offers additional functional features not previously available in yeast CC data analysis, such as the footprint function. Because the Ty5 transposon used in the yeast CC assay has no insertion sequence bias, binding targets with large numbers of insertions often display two peak summits that flank the TF's sequence motif, thought to be caused by steric hindrance of TF binding. The Pycallingcards footprint function can be used to identify this absence of insertions within the peak, which could be used as a tool to identify TF binding sites with greater resolution.

We next performed peak annotation and differential peak binding analysis of published yeast CC data. Here, we analyzed yeast CC data from Shively et al (Shively, Liu, Chen, Loell, & Mitra, 2019). Specifically, we analyzed the yeast TF Tye7p in wild type and *gcr2Δ* yeast, in which the coding sequence of the TF Gcr2p has been deleted from the genome. From these CC experiments and other data, Gcr2p and Tye7p were found to bind genomic targets together with Rap1p and Gcr1p as a cooperative collective. To identify Tye7p targets differentially bound in the presence or absence of Gcr2p, qbed files from Tye7p CC assays conducted in the two strains (WT vs *gcr2Δ*) were combined. MACCs was then used with a window size of 125, step size 50, and p-value cutoff of  $1e-4$  to call 68 peaks in total, with the Fisher's exact test used to calculate significant binding. Following peak calling, the annotation function was used to find the closest genes upstream and downstream of each peak. We then overlaid mRNA expression microarray data from either deletion of GCR2 or overexpression of Tye7p and Gcr2p Tye7p (Hackett et al., 2020; Kemmeren et al., 2014) to connect mRNA levels to Tye7p binding, since Tye7p and Gcr2p are thought to bind cooperatively. Table 6 shows the full results for differential binding of Tye7p between the WT and GCR2 deletion strain. Each row represents one peak and shows whether it is significantly more bound in the WT strain (group: Tye7p) or the *gcr2Δ* strain (group: Tye7p *gcr2Δ*). In agreement with previous work, Tye7p has significantly decreased binding to native targets in the absence of Gcr2p. Most of these MACCs-called peaks are associated with strong gene expression changes when Tye7p or another member of the cooperative collective is perturbed, according to mRNA expression signatures. Furthermore, we now report spurious Tye7p targets that appear in the absence of Gcr2p. Somewhat perplexingly, several of these new targets that appear upon deletion of Gcr2p may in fact be authentic Tye7p targets, as they are also associated with downstream gene expression changes. The differential Tye7p binding uncovered by MACCs in conjunction with Pycallingcards recapitulates previous results and provides new avenues for discovery of gene regulatory mechanisms.

## 2 Addition notes for peak calling

Given that the PBase transposase targets TTAA tetranucleotides with exclusivity, these sites inherently represent the natural potential for binding events across the genome. While the distribution of TTAA sites is random, it is not uniform, leading to differential insertion probabilities. To empirically demonstrate the necessity of accounting for TTAA sites in our analysis, we conducted peak calling on the same unfused data in Figure 2c left against a backdrop of uniform genomic distribution. As depicted in the accompanying Figure 4, the incorporation of TTAA site consideration significantly enhances the congruence of our peak calling results with the ChIP-seq data signals. This clearly indicates that integrating TTAA site prevalence into our peak calling methodology is crucial for accurately capturing the true signal intensity and distribution.

### 2.1 Simulation

To more effectively demonstrate our methods' feasibility, we performed simulation analyses on both fused and unfused data in bulk and single-cell scenarios.

In the unfused simulation, our initial step involved analyzing the interaction between ChIP-seq H3K27ac (ENCFF044JNJ) and Brd4 (ENCFF130JVF) data of K562 cell line sourced from ENCODE. We then extended the peak lengths and applied filters based on the presence of TTAA sites. The data was presumed to include: 1) insertions from authentic Brd4 peaks, 2) insertions from random peaks, and 3) random insertions across the genome. Notably, the number of insertions from actual Brd4 peaks outnumbered those from random peaks by 28.9 times. These random peaks were uniformly distributed throughout the genome, avoiding overlap with genuine Brd4 peaks (Gogol-Döring et al., 2016).

In the SP1 data simulation, we treated CHIP-seq peaks downloaded from ENCODE (ENCFF044JNJ) similarly, extending and filtering them. A critical point to consider is the potential overlap between SP1 and Brd4 peaks. Insertions from SP1 peaks were 100 times more frequent than those from random peaks. The bulk dataset comprised over ten million insertions, while the single-cell dataset contained approximately two million.

Three key metrics were charted (Figure 5): sensitivity, specificity, and False Discovery Rate (FDR). True Positivity (TP) was defined as the occurrence of genuine peaks overlapping by at least 200 base pairs (bp). False Positivity (FP) was determined by the count of random peaks in unfused data or the aggregate of random peaks and non-overlapping Brd4 and SP1 peaks. True Negativity (TN) was calculated as the total false peaks minus FP, and False Negativity (FN) as the total real peaks minus TP.

Sensitivity, or the true positive rate, gauges the proportion of correctly identified actual positives. It is the ratio of TP (real peaks overlapping with called peaks by at least 200 bp) to the sum of TP and FN (real peaks not overlapping with called peaks). Specificity, or the true negative rate, evaluates the proportion of accurately identified actual negatives, calculated as the ratio of TN (total false peaks minus FP) to the sum of TN and FP (called peaks not corresponding to real peaks or Brd4 peaks not overlapping with SP1 peaks).

A peak qualifies as genuine based on its overlap with real peaks, provided the overlap is at least equal to that of false peaks. The FDR is determined as 1 minus the ratio of genuine peaks identified among all peaks.

Our results demonstrate that CCcaller, MACCs and ccf\_tools exhibit superior sensitivity and specificity compared to other methods. Notably, the peaks identified are highly specific, resulting in an exceptionally low false positive rate. In summary, CCcaller is recommended for unfused data, whereas MACCs may be more suitable for fused data.



# 3 Figures

## 3.1 Figure 1

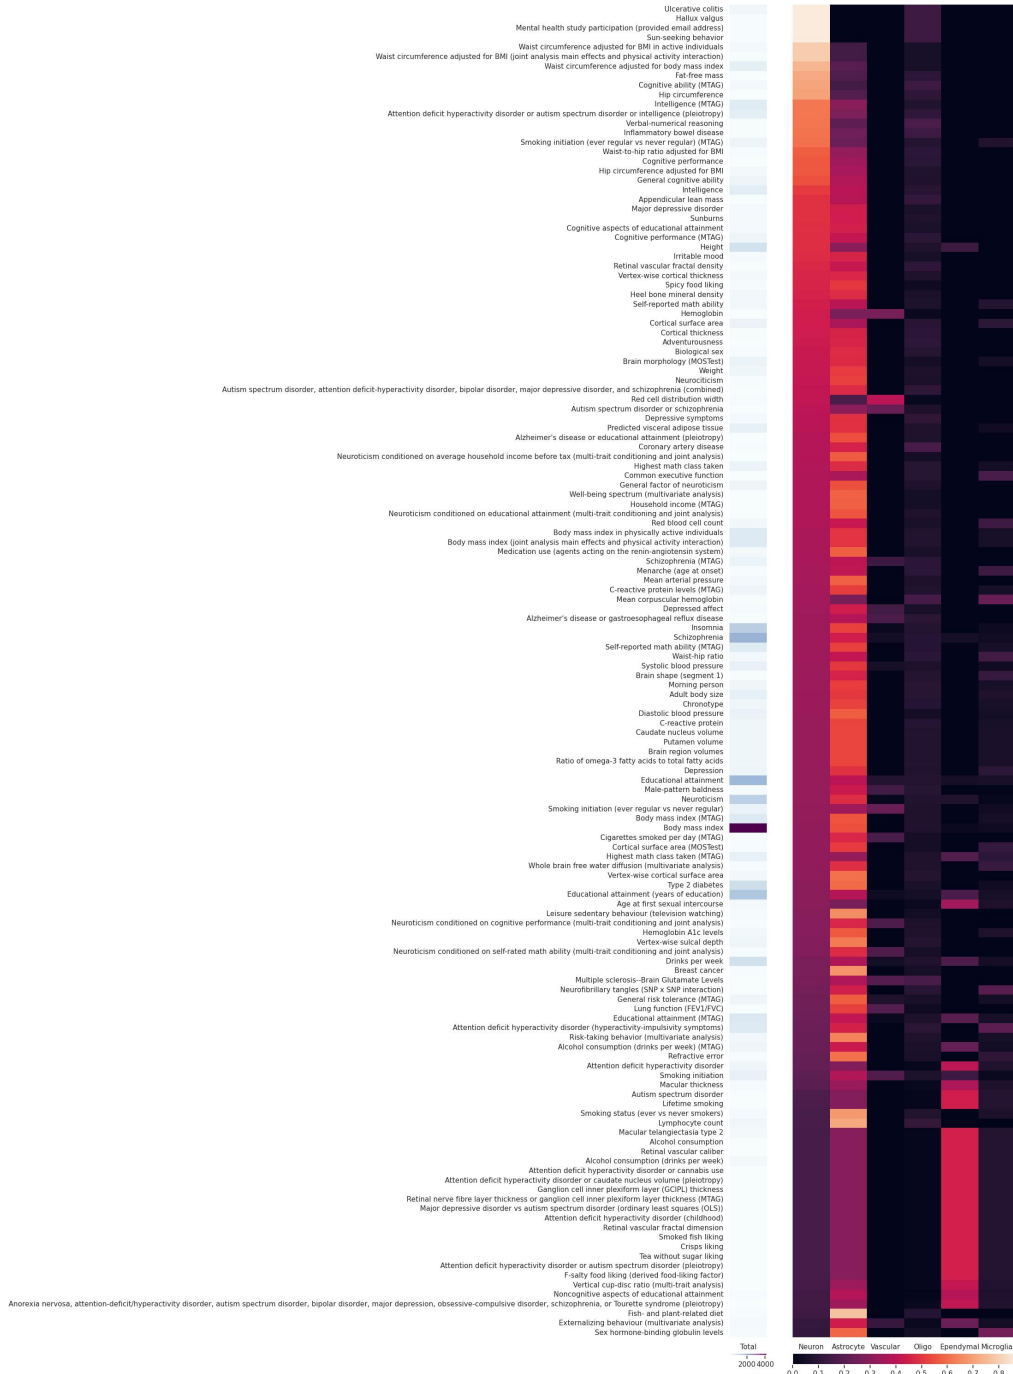

Figure 1: GWAS results for mouse cortex data among different cell types. The first column indicates the total times detected. The rest six columns show the relative time detected by different cell types.

### 3.2 Figure 2

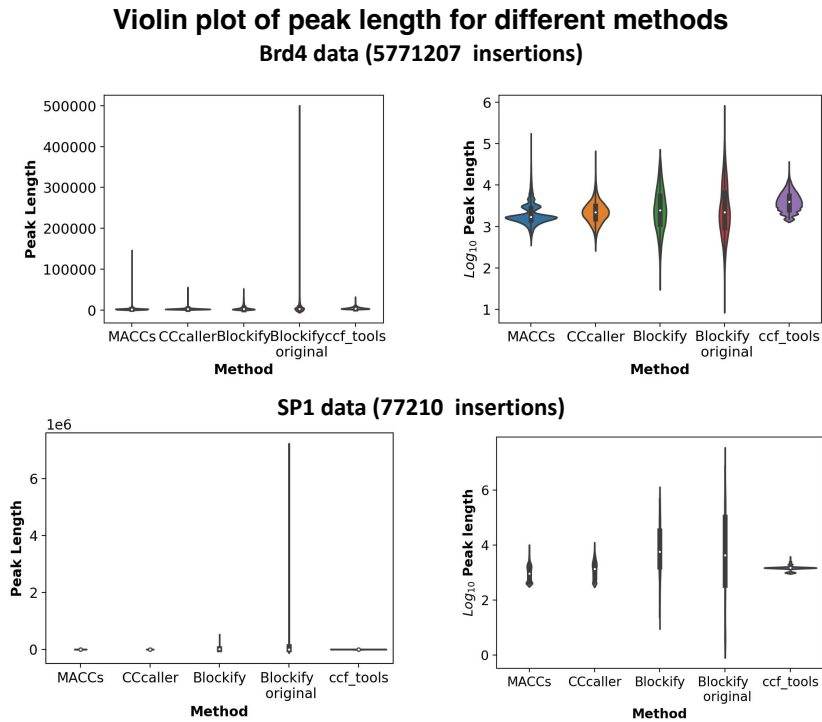

Figure 2: Violin plot of peak length for different methods with Brd4 data and SP1 data.

### 3.3 Figure 3

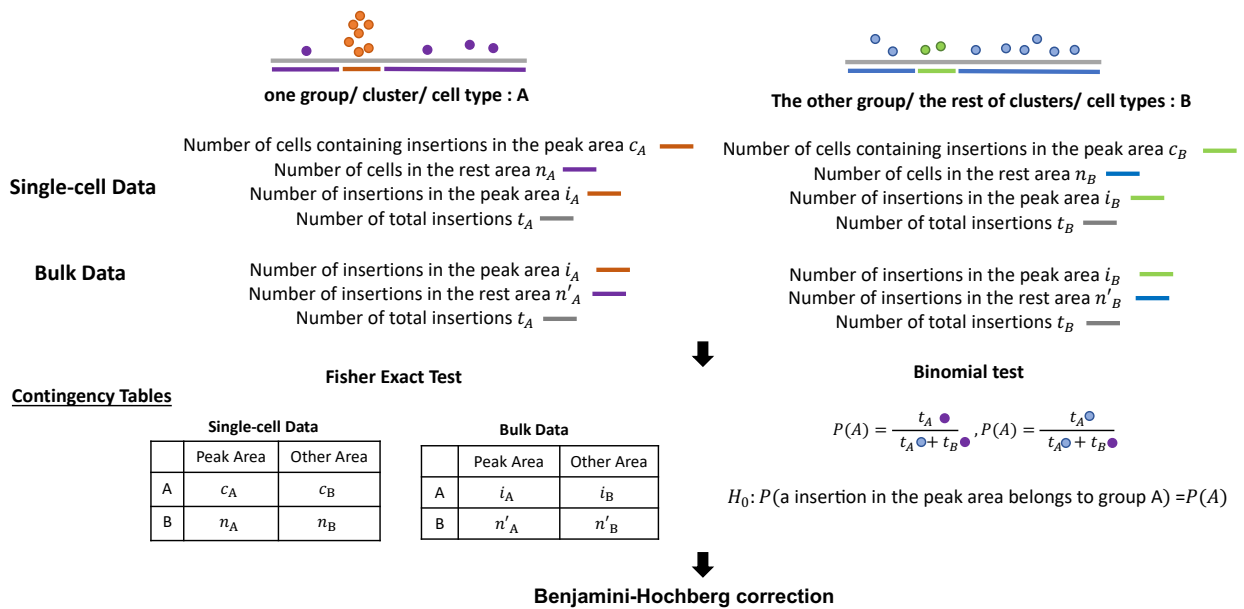

Figure 3: Differential peak analysis workflow.

### 3.4 Figure 4

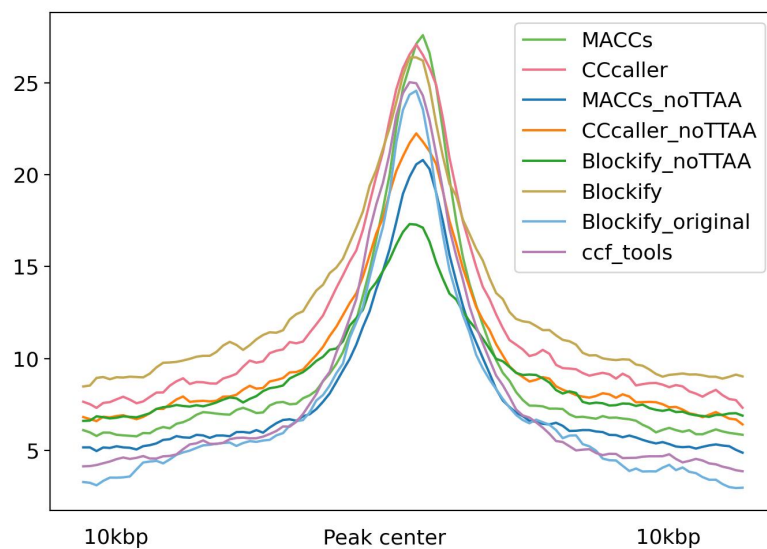

Figure 4: Chip-seq signal in calling cards peaks for the different peak calling methods in Pycallingcards: Comparing with/without TTAA distribution

### 3.5 Figure 5

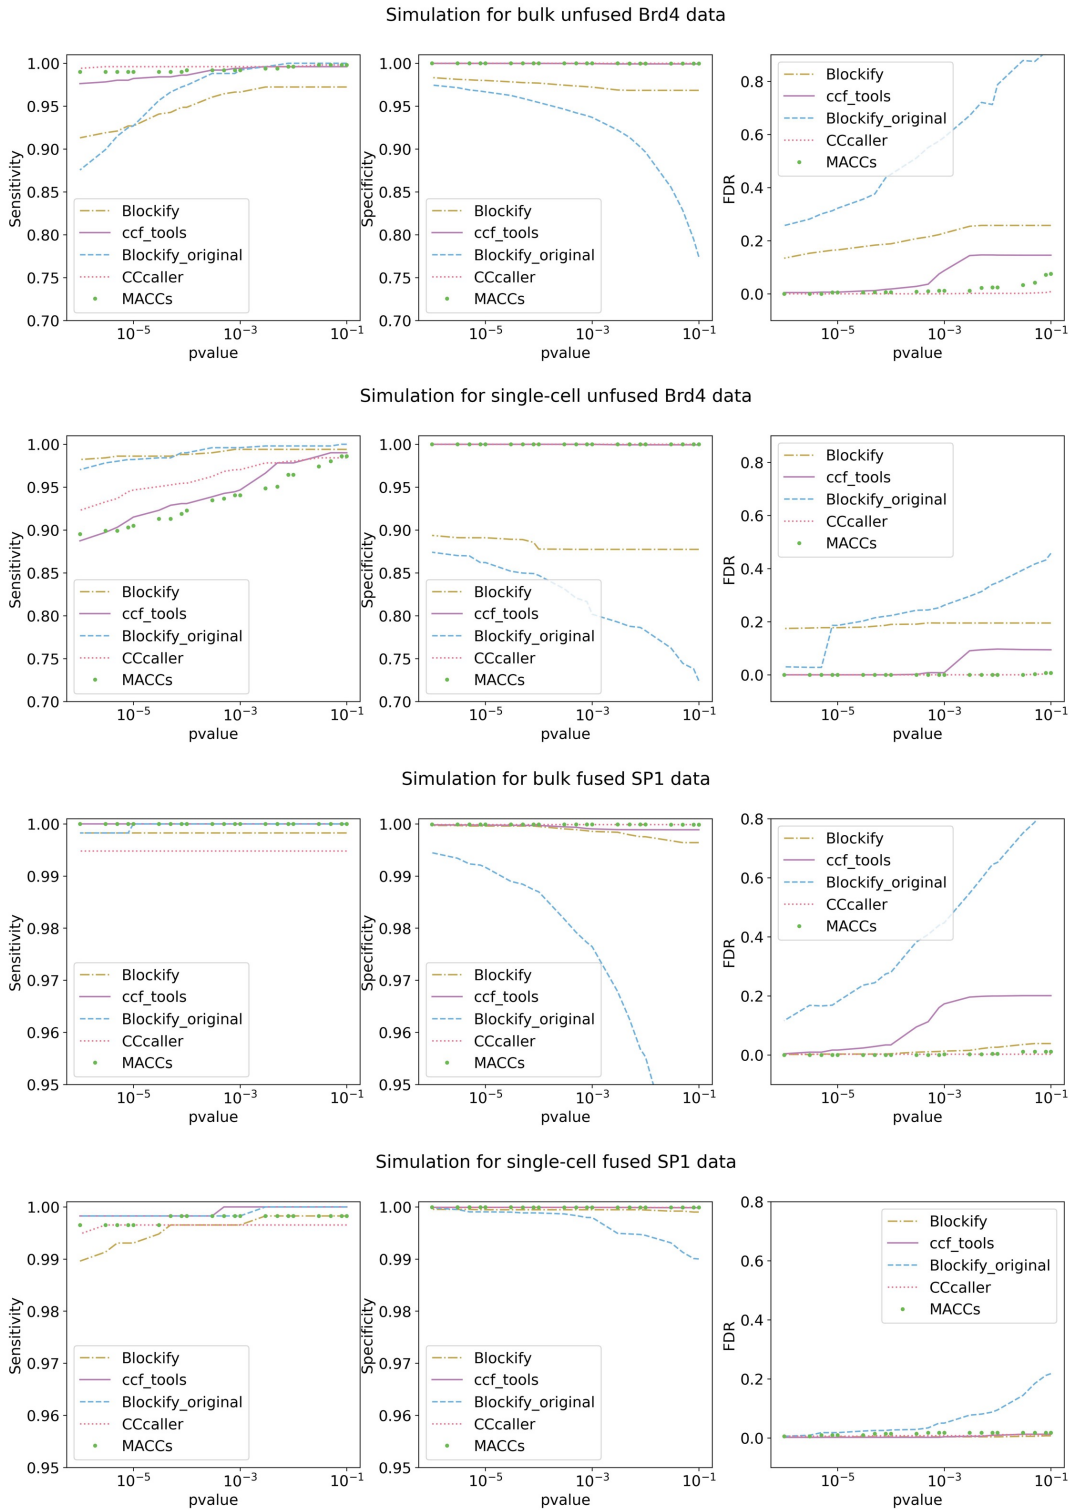

Figure 5: Simulation result.

## 4 Tables

### 4.1 1

Table 1: Data Resources

| DATASET                                                                                                    | SOURCE                                         | IDENTIFIER                              |
|------------------------------------------------------------------------------------------------------------|------------------------------------------------|-----------------------------------------|
| HyPBase calling cards data in K562 cell line                                                               | This study                                     | GEO: GSE248420                          |
| HyPBase calling cards data in HCT116 cell line                                                             | Robi D. Mitra<br>(Moudgil et al., 2020)        | GEO: GSM4471638                         |
| SP1 hyPBase calling cards data in HCT116 cell line                                                         | Robi D. Mitra<br>(Moudgil et al., 2020)        | GEO: GSM4471639                         |
| HyPBase single-cell calling cards data in HCT116 cell line                                                 | Robi D. Mitra<br>(Moudgil et al., 2020)        | GEO: GSM4471646                         |
| SP1 hyPBase single-cell calling cards data in HCT116 cell line                                             | Robi D. Mitra<br>(Moudgil et al., 2020)        | GEO: GSM4471648                         |
| ChIP-seq H3K27ac data in HCT116 cell line                                                                  | Mark Gerstein<br>(J. Zhang, Lee, et al., 2020) | ENCODE:<br>ENCSR661KMA<br>(ENCFF997CJQ) |
| ChIP-seq SP1 data in HCT116 cell line                                                                      | ENCODE<br>(Consortium et al., 2012)            | ENCODE:<br>ENCFF587ZMX                  |
| Mouse cortex single-cell hyPBase calling cards data                                                        | Robi D. Mitra<br>(Moudgil et al., 2020)        | GEO: GSM4471660                         |
| Mouse cortex single-cell hyPBase RNA-seq data                                                              | Robi D. Mitra<br>(Moudgil et al., 2020)        | GEO: GSM4471659                         |
| Brd4-bound enhancers drive cell intrinsic calling cards data in sex differences of glioblastoma            | Joshua B. Rubin<br>(Kfoury et al., 2021)       | GEO: GSE156678                          |
| Brd4-bound enhancers drive cell intrinsic RNA-seq data in sex differences of glioblastoma                  | Joshua B. Rubin<br>(Kfoury et al., 2021)       | GEO: GSE156819                          |
| Tye7p yeast calling cards data                                                                             | Robi D. Mitra<br>(Shively et al., 2019)        | GEO: GSM3946397                         |
| Tye7p in $\Delta$ strain background yeast calling cards data                                               | Robi D. Mitra<br>(Shively et al., 2019)        | GEO: GSM3946398                         |
| Compendium of deletion mutant gene expression profiles for <i>gcr2</i> $\Delta$ deletion                   | Frank C.P. Holstege<br>(Kemmeren et al., 2014) | GEO: GSE42527                           |
| A small molecule transcriptional induction system is used to induce TFs in <i>Saccharomyces cerevisiae</i> | R Scott McIsaac<br>(Hackett et al., 2020)      | GEO: GSE142864                          |
| ChIP-seq H3K27ac data in K562 cell line                                                                    | Mark Gerstein<br>(J. Zhang, Lee, et al., 2020) | ENCODE:<br>ENCSR000AKP<br>(ENCFF044JNJ) |
| ChIP-seq Brd4 data in K562 cell line                                                                       | Mark Gerstein<br>(J. Zhang, Liu, et al., 2020) | ENCODE:<br>ENCSR583ACG<br>(ENCFF130JVF) |

ChIP-seq SP1 data in K562 cell line

ENCODE  
(Consortium et al., 2012)

ENCODE:  
ENCSR000BKO  
(ENCFF171NEU)

---

Table2: Differentiated Results for Mouse Cortex Data

| Cluster   | Peak                      | Logfold-changes for Peak | Pvalue_peak  | Pvalue_adj_peak | Gene          | Score_gene | Pvalue_gene   | Pvalue_adj_gene | Chr_liftover | Start_liftover | End_liftover | Chr_hg38 | Start_hg38 | End_hg38  | GWAS                                                                                                                                                                                                                                                                                                                                                                                                                                                      |
|-----------|---------------------------|--------------------------|--------------|-----------------|---------------|------------|---------------|-----------------|--------------|----------------|--------------|----------|------------|-----------|-----------------------------------------------------------------------------------------------------------------------------------------------------------------------------------------------------------------------------------------------------------------------------------------------------------------------------------------------------------------------------------------------------------------------------------------------------------|
| Astrocyte | chr16_43501178_43518253   | 3.077262                 | 1.462410e-16 | 3.297735e-14    | Zbth20        | 79.234276  | 0.000000e+00  | 0.000000e+00    | chr3         | 114439800      | 114457200    | chr3     | 114314499  | 115147280 | Schizophrenia; Smoking status (ever vs never smokers); Smoking initiation; Vertex-wise sulcal depth                                                                                                                                                                                                                                                                                                                                                       |
| Astrocyte | chr8_64645834_64659215    | 4.623955                 | 3.114365e-14 | 3.794710e-12    | Msmo1         | 61.964111  | 0.000000e+00  | 0.000000e+00    | chr4         | 165418445      | 165438029    | chr4     | 165327665  | 165343162 | Atopic dermatitis (moderate to severe)                                                                                                                                                                                                                                                                                                                                                                                                                    |
| Astrocyte | chr2_141928409_141939733  | 4.876938                 | 3.786296e-14 | 3.794710e-12    | Bmpr1b        | 24.131538  | 2.475603e-121 | 1.659753e-120   | chr4         | 95040417       | 95054959     | chr4     | 94757976   | 95158450  |                                                                                                                                                                                                                                                                                                                                                                                                                                                           |
| Astrocyte | chr4_97575305_97588788    | 3.099679                 | 5.907086e-14 | 5.328192e-12    | E130114P18Rik | 16.893749  | 3.380841e-62  | 1.514206e-61    | chr1         | 60858298       | 60872361     | chr1     | 61072723   | 61462788  | Refractive error                                                                                                                                                                                                                                                                                                                                                                                                                                          |
| Astrocyte | chr4_97575305_97588788    | 3.099679                 | 5.907086e-14 | 5.328192e-12    | Nfia          | 45.417362  | 0.000000e+00  | 0.000000e+00    | chr1         | 60858298       | 60872361     | chr1     | 61072723   | 61462788  | Refractive error                                                                                                                                                                                                                                                                                                                                                                                                                                          |
| Astrocyte | chr6_36787352_36796453    | 4.732581                 | 1.169436e-12 | 8.114085e-11    | Ptn           | 54.479534  | 0.000000e+00  | 0.000000e+00    | chr7         | 137319476      | 137327945    | chr7     | 137227345  | 137343990 | Educational attainment (years of education)                                                                                                                                                                                                                                                                                                                                                                                                               |
| Astrocyte | chr19_55100686_55103496   | 11.581732                | 3.142675e-12 | 2.024780e-10    | Gpam          | 16.416140  | 6.481936e-59  | 2.812270e-58    | chr10        | 112188868      | 112189882    | chr10    | 112149863  | 112183779 |                                                                                                                                                                                                                                                                                                                                                                                                                                                           |
| Astrocyte | chr7_54834211_54844532    | 4.164636                 | 6.770998e-10 | 2.655409e-08    | Siglech       | -17.794437 | 1.929032e-70  | 9.217479e-70    | chr11        | 24495239       | 24507621     | chr11    | 24496969   | 25082640  | Plasma neurofilament light levels                                                                                                                                                                                                                                                                                                                                                                                                                         |
| Astrocyte | chr7_54834211_54844532    | 4.164636                 | 6.770998e-10 | 2.655409e-08    | Luzp2         | 59.469765  | 0.000000e+00  | 0.000000e+00    | chr11        | 24495239       | 24507621     | chr11    | 24496969   | 25082640  | Plasma neurofilament light levels                                                                                                                                                                                                                                                                                                                                                                                                                         |
| Astrocyte | chr8_89307714_89312307    | 5.176061                 | 1.618619e-09 | 5.615364e-08    | Sall1         | 15.833781  | 4.203102e-55  | 1.750790e-54    | chr16        | 51439323       | 51443812     | chr16    | 51135974   | 51151272  |                                                                                                                                                                                                                                                                                                                                                                                                                                                           |
| Astrocyte | chr15_95649630_95653550   | 5.176061                 | 1.618619e-09 | 5.615364e-08    | Dbx2          | 38.563210  | 3.149195e-282 | 4.054453e-281   | chr12        | 45045820       | 45049965     | chr12    | 45014755   | 45051099  |                                                                                                                                                                                                                                                                                                                                                                                                                                                           |
| Astrocyte | chr6_141524183_141528573  | 11.096493                | 6.078344e-09 | 1.890575e-07    | Sloc1c1       | 49.340008  | 0.000000e+00  | 0.000000e+00    | chr12        | 20695270       | 20698151     | chr12    | 20695354   | 20753386  |                                                                                                                                                                                                                                                                                                                                                                                                                                                           |
| Astrocyte | chr1_14302176_14310895    | 5.916935                 | 9.478474e-09 | 2.757930e-07    | Eyal1         | 25.117405  | 8.534710e-131 | 6.012811e-130   | chr8         | 71354173       | 71362942     | chr8     | 71197432   | 71362232  | Chronic obstructive pulmonary disease-related biomarkers                                                                                                                                                                                                                                                                                                                                                                                                  |
| Astrocyte | chr4_105166110_105175360  | 5.916935                 | 9.478474e-09 | 2.757930e-07    | Ppp3          | 162.952625 | 0.000000e+00  | 0.000000e+00    | chr1         | 56558059       | 56567379     | chr1     | 56494746   | 56579584  |                                                                                                                                                                                                                                                                                                                                                                                                                                                           |
| Astrocyte | chr13_89583161_89588793   | 4.356304                 | 2.136393e-07 | 4.817567e-06    | Hapln1        | 34.593361  | 9.429821e-234 | 1.012643e-232   | chr5         | 83666573       | 83675163     | chr5     | 83638197   | 83721077  | Vaginal microbiome MetaCyc pathway (PYRIDNUCSYN-PWY)NAD biosynthesis I (from aspartate); Vaginal microbiome MetaCyc pathway (PWY-2941)L-lysine biosynthesis II; Vaginal microbiome MetaCyc pathway (PWY-2942)L-lysine biosynthesis III; Vaginal microbiome MetaCyc pathway (VALSYN-PWY)L-valine biosynthesis                                                                                                                                              |
| Astrocyte | chr6_36774153_36779449    | 3.603368                 | 2.292117e-07 | 4.922594e-06    | Ptn           | 54.479534  | 0.000000e+00  | 0.000000e+00    | chr7         | 137302397      | 137307872    | chr7     | 137227345  | 137343990 |                                                                                                                                                                                                                                                                                                                                                                                                                                                           |
| Astrocyte | chr2_170286475_170289090  | 4.797702                 | 2.987844e-07 | 5.390070e-06    | Beas1         | -25.416523 | 2.540125e-139 | 1.862290e-138   | chr20        | 53865018       | 53867907     | chr20    | 53943537   | 54070765  |                                                                                                                                                                                                                                                                                                                                                                                                                                                           |
| Astrocyte | chr13_119753053_119756787 | 4.797702                 | 2.987844e-07 | 5.390070e-06    | Nim1k         | 25.519909  | 3.777848e-139 | 5.398411e-138   | chr5         | 43191219       | 43195768     | chr5     | 43192067   | 43280850  |                                                                                                                                                                                                                                                                                                                                                                                                                                                           |
| Astrocyte | chr2_83826634_83830409    | 3.749735                 | 4.048661e-07 | 6.639805e-06    | Itgav         | 22.557999  | 1.326365e-106 | 8.246725e-106   | chr2         | 186711540      | 186714686    | chr2     | 186590062  | 186680902 | Inflammatory bowel disease; Crohn's disease                                                                                                                                                                                                                                                                                                                                                                                                               |
| Astrocyte | chr3_34660305_34666432    | 3.749735                 | 4.048661e-07 | 6.639805e-06    | Sox2          | 48.07873   | 0.000000e+00  | 0.000000e+00    | chr3         | 181722645      | 181728925    | chr3     | 181711923  | 181714435 | Diastolic blood pressure (baseline)                                                                                                                                                                                                                                                                                                                                                                                                                       |
| Astrocyte | chr4_97842250_97846042    | 3.487933                 | 1.046381e-06 | 1.573060e-05    | E130114P18Rik | 16.893749  | 3.380841e-62  | 1.514206e-61    | chr1         | 61154080       | 61158476     | chr1     | 61072723   | 61462788  | Thyroid hormone levels; Erectile dysfunction                                                                                                                                                                                                                                                                                                                                                                                                              |
| Astrocyte | chr4_97842250_97846042    | 3.487933                 | 1.046381e-06 | 1.573060e-05    | Nfia          | 45.417362  | 0.000000e+00  | 0.000000e+00    | chr1         | 61154080       | 61158476     | chr1     | 61072723   | 61462788  | Thyroid hormone levels; Erectile dysfunction                                                                                                                                                                                                                                                                                                                                                                                                              |
| Astrocyte | chr4_97757056_97761515    | 3.189871                 | 1.273742e-06 | 1.853089e-05    | Nfia          | 45.417362  | 0.000000e+00  | 0.000000e+00    | chr1         | 61056667       | 61063071     | chr1     | 61072723   | 61462788  |                                                                                                                                                                                                                                                                                                                                                                                                                                                           |
| Astrocyte | chr1_161271808_161275172  | 4.645772                 | 1.656509e-06 | 2.334642e-05    | Prdx6         | 110.516226 | 0.000000e+00  | 0.000000e+00    | chr1         | 173430714      | 173438520    | chr1     | 173477346  | 173488807 |                                                                                                                                                                                                                                                                                                                                                                                                                                                           |
| Astrocyte | chrX_66657396_66661253    | 4.645772                 | 1.656509e-06 | 2.334642e-05    | Slitrk2       | 23.033348  | 1.539695e-111 | 9.809484e-111   | chrX         | 145825915      | 145829852    | chrX     | 145817828  | 145825842 |                                                                                                                                                                                                                                                                                                                                                                                                                                                           |
| Astrocyte | chr15_95690995_95691836   | 10.582202                | 1.772759e-06 | 2.460044e-05    | Dbx2          | 38.563210  | 3.149195e-282 | 4.054453e-281   | chr12        | 45089094       | 45089324     | chr12    | 45014755   | 45051099  |                                                                                                                                                                                                                                                                                                                                                                                                                                                           |
| Astrocyte | chr18_81165183_81167067   | 5.457728                 | 2.083387e-06 | 2.684593e-05    | Sall3         | 27.820368  | 1.091092e-157 | 8.722163e-157   | chr18        | 78701389       | 78703288     | chr18    | 78701389   | 78703288  |                                                                                                                                                                                                                                                                                                                                                                                                                                                           |
| Astrocyte | chr4_97902048_97910959    | 3.362452                 | 4.659168e-06 | 5.756945e-05    | E130114P18Rik | 16.893749  | 3.380841e-62  | 1.514206e-61    | chr1         | 61218524       | 61226920     | chr1     | 61072723   | 61462788  | Triglyceride levels; Sex hormone-binding globulin levels adjusted for BMI; Sex hormone-binding globulin levels; Total testosterone levels; Non-HDL cholesterol levels; Hair color                                                                                                                                                                                                                                                                         |
| Astrocyte | chr4_97902048_97910959    | 3.362452                 | 4.659168e-06 | 5.756945e-05    | Nfia          | 45.417362  | 0.000000e+00  | 0.000000e+00    | chr1         | 61218524       | 61226920     | chr1     | 61072723   | 61462788  | Triglyceride levels; Sex hormone-binding globulin levels adjusted for BMI; Sex hormone-binding globulin levels; Total testosterone levels; Non-HDL cholesterol levels; Hair color                                                                                                                                                                                                                                                                         |
| Astrocyte | chr16_43462811_43467699   | 4.066931                 | 5.729681e-06 | 6.890897e-05    | Zbth20        | 79.234276  | 0.000000e+00  | 0.000000e+00    | chr3         | 114495525      | 114500568    | chr3     | 114314499  | 115147280 | Height                                                                                                                                                                                                                                                                                                                                                                                                                                                    |
| Astrocyte | chr7_93061766_93064465    | 5.265201                 | 1.231085e-05 | 1.321950e-04    | Fam181b       | 37.657539  | 4.819317e-271 | 5.941159e-270   | chr11        | 82754461       | 82758070     | chr11    | 82732003   | 82733864  |                                                                                                                                                                                                                                                                                                                                                                                                                                                           |
| Astrocyte | chr12_53947288_53948638   | 10.359967                | 1.175631e-05 | 1.321950e-04    | Npas3         | 53.549488  | 0.000000e+00  | 0.000000e+00    | chr14        | 33676336       | 33677661     | chr14    | 32939252   | 33804176  |                                                                                                                                                                                                                                                                                                                                                                                                                                                           |
| Astrocyte | chr4_43971688_43975452    | 5.265201                 | 1.231085e-05 | 1.321950e-04    | Glipr2        | 9.467184   | 4.420477e-21  | 1.157486e-20    | chr9         | 36151753       | 36155167     | chr9     | 36136535   | 36163913  |                                                                                                                                                                                                                                                                                                                                                                                                                                                           |
| Astrocyte | chr4_432514332_132516335  | 5.265201                 | 1.231085e-05 | 1.321950e-04    | Sesn2         | 9.228589   | 3.980041e-20  | 1.019879e-19    | chr1         | 28247139       | 28249353     | chr1     | 28259451   | 28284921  |                                                                                                                                                                                                                                                                                                                                                                                                                                                           |
| Astrocyte | chr14_103833967_103838400 | 10.359967                | 1.175631e-05 | 1.321950e-04    | Ednrb         | 56.828690  | 0.000000e+00  | 0.000000e+00    | chr13        | 77909156       | 77913819     | chr13    | 77895480   | 77975273  |                                                                                                                                                                                                                                                                                                                                                                                                                                                           |
| Astrocyte | chr6_141567438_141569615  | 3.897097                 | 2.866836e-05 | 2.810745e-04    | Sloc1c1       | 49.340008  | 0.000000e+00  | 0.000000e+00    | chr12        | 20750659       | 20752611     | chr12    | 20695354   | 20753386  | Ceramide (d17:1/16:0) levels                                                                                                                                                                                                                                                                                                                                                                                                                              |
| Astrocyte | chr6_141567438_141569615  | 3.897097                 | 2.866836e-05 | 2.810745e-04    | Sloc1b2       | 9.574473   | 1.624957e-21  | 4.295453e-21    | chr12        | 20750659       | 20752611     | chr12    | 20695354   | 20753386  | Ceramide (d17:1/16:0) levels                                                                                                                                                                                                                                                                                                                                                                                                                              |
| Astrocyte | chr5_9551451_9558364      | 3.897097                 | 2.866836e-05 | 2.810745e-04    | Grm3          | 25.906481  | 8.773381e-139 | 6.414478e-138   | chr7         | 86792861       | 86810903     | chr7     | 86643913   | 86864876  | Schizophrenia; Schizophrenia vs ADHD (ordinary least squares (OLS)); Autism spectrum disorder (schizophrenia); Bipolar disorder (MTAG); Schizophrenia (MTAG); Anorexia nervosa, attention-deficit/hyperactivity disorder, autism spectrum disorder, bipolar disorder, major depression, obsessive-compulsive disorder, schizophrenia, or Tourette syndrome (pleiotropy); Cognitive ability, years of educational attainment or schizophrenia (pleiotropy) |
| Astrocyte | chr10_57785182_57787861   | 5.042965                 | 7.165764e-05 | 6.214923e-04    | Smpd3a        | 24.626255  | 4.559749e-126 | 3.142100e-125   | chr6         | 122779971      | 122783477    | chr6     | 122789048  | 122809719 |                                                                                                                                                                                                                                                                                                                                                                                                                                                           |
| Astrocyte | chr10_57785182_57787861   | 5.042965                 | 7.165764e-05 | 6.214923e-04    | Fabp7         | 40.557236  | 9.333561e-309 | 1.296925e-307   | chr6         | 122779971      | 122783477    | chr6     | 122749200  | 122784077 |                                                                                                                                                                                                                                                                                                                                                                                                                                                           |
| Astrocyte | chr19_18887469_18888841   | 5.042965                 | 7.165764e-05 | 6.214923e-04    | Rorb          | 39.974609  | 2.998225e-306 | 4.132123e-305   | chr9         | 74728437       | 74729816     | chr9     | 74497335   | 74687201  |                                                                                                                                                                                                                                                                                                                                                                                                                                                           |
| Astrocyte | chrX_110808176_110813229  | 5.042965                 | 7.165764e-05 | 6.214923e-04    | Pou3f4        | 17.160261  | 4.431524e-64  | 2.016876e-63    | chrX         | 83501946       | 83507160     | chrX     | 83508260   | 83509767  |                                                                                                                                                                                                                                                                                                                                                                                                                                                           |
| Astrocyte | chr10_56837049_56842478   | 3.704570                 | 1.393020e-04 | 1.092612e-03    | Gja1          | 161.039825 | 0.000000e+00  | 0.000000e+00    | chr6         | 121845842      | 121851588    | chr6     | 121435576  | 121449744 | Resting heart rate                                                                                                                                                                                                                                                                                                                                                                                                                                        |
| Astrocyte | chr12_5097345_25101520    | 3.704570                 | 1.393020e-04 | 1.092612e-03    | Id2           | 53.676070  | 0.000000e+00  | 0.000000e+00    | chr2         | 8676341        | 8680475      | chr2     | 8681982    | 8684453   | Cognitive function (immediate memory) (longitudinal); Smoking initiation                                                                                                                                                                                                                                                                                                                                                                                  |
| Astrocyte | chr12_52471736_52476169   | 3.704570                 | 1.393020e-04 | 1.092612e-03    | Arhgap5       | 33.806904  | 2.084607e-226 | 2.184311e-225   | chr14        | 32040797       | 32045534     | chr14    | 32077288   | 32159728  |                                                                                                                                                                                                                                                                                                                                                                                                                                                           |
| Astrocyte | chrX_82814085_82817872    | 3.704570                 | 1.393020e-04 | 1.092612e-03    | Dmd           | 22.847645  | 3.553036e-110 | 2.248239e-109   | chrX         | 33336368       | 33340186     | chrX     | 31119227   | 33339609  |                                                                                                                                                                                                                                                                                                                                                                                                                                                           |

|                       |                          |          |              |              |        |            |               |               |       |           |           |       |           |           |                                                                                                                                                                                                                                                                                                                                                                                                                                                                                                                                                                                                                                                                                                                                                                                                                                                    |
|-----------------------|--------------------------|----------|--------------|--------------|--------|------------|---------------|---------------|-------|-----------|-----------|-------|-----------|-----------|----------------------------------------------------------------------------------------------------------------------------------------------------------------------------------------------------------------------------------------------------------------------------------------------------------------------------------------------------------------------------------------------------------------------------------------------------------------------------------------------------------------------------------------------------------------------------------------------------------------------------------------------------------------------------------------------------------------------------------------------------------------------------------------------------------------------------------------------------|
| Astrocyte             | chr8_89034093_89040778   | 3.292603 | 3.329108e-04 | 2.345981e-03 | Sall1  | 15.833781  | 4.203102e-55  | 1.750790e-54  | chr16 | 51142875  | 51149485  | chr16 | 51135974  | 51151272  | Vertical cup-disc ratio (adjusted for vertical disc diameter); Vertical cup-disc ratio (multi-trait analysis); Insomnia; Vertex-wise sulcal depth; Self-reported math ability; Self-reported math ability (MTAG)                                                                                                                                                                                                                                                                                                                                                                                                                                                                                                                                                                                                                                   |
| Astrocyte             | chr3_121721058_121723454 | 4.780151 | 4.090009e-04 | 2.692838e-03 | F3     | 63.434364  | 0.000000e+00  | 0.000000e+00  | chr1  | 94541919  | 94545222  | chr1  | 94529175  | 94541857  |                                                                                                                                                                                                                                                                                                                                                                                                                                                                                                                                                                                                                                                                                                                                                                                                                                                    |
| Astrocyte             | chrX_16909454_16912173   | 4.780151 | 4.090009e-04 | 2.692838e-03 | Ndp    | 20.796898  | 6.535406e-92  | 3.707322e-91  | chrX  | 43971374  | 43974093  | chrX  | 43948775  | 43973675  |                                                                                                                                                                                                                                                                                                                                                                                                                                                                                                                                                                                                                                                                                                                                                                                                                                                    |
| Astrocyte             | chrX_16909454_16912173   | 4.780151 | 4.090009e-04 | 2.692838e-03 | Maob   | 19.810839  | 6.363952e-84  | 3.394473e-83  | chrX  | 43971374  | 43974093  | chrX  | 43766609  | 43882475  |                                                                                                                                                                                                                                                                                                                                                                                                                                                                                                                                                                                                                                                                                                                                                                                                                                                    |
| Astrocyte             | chr14_34501484_34506018  | 4.780151 | 4.090009e-04 | 2.692838e-03 | Bmpr1a | 17.371780  | 9.519241e-66  | 4.383948e-65  | chr10 | 86752934  | 86757882  | chr10 | 86756638  | 86925188  |                                                                                                                                                                                                                                                                                                                                                                                                                                                                                                                                                                                                                                                                                                                                                                                                                                                    |
| Astrocyte             | chr9_13581428_13583991   | 4.780151 | 4.090009e-04 | 2.692838e-03 | Maml2  | 13.798990  | 1.635705e-42  | 5.967817e-42  | chr11 | 96137061  | 96139025  | chr11 | 95976592  | 96343180  |                                                                                                                                                                                                                                                                                                                                                                                                                                                                                                                                                                                                                                                                                                                                                                                                                                                    |
| Astrocyte             | chr11_35976787_35978806  | 4.780151 | 4.090009e-04 | 2.692838e-03 | Tenn2  | -99.841782 | 0.000000e+00  | 0.000000e+00  | chr5  | 168293642 | 168295706 | chr5  | 167284837 | 168264157 |                                                                                                                                                                                                                                                                                                                                                                                                                                                                                                                                                                                                                                                                                                                                                                                                                                                    |
| Astrocyte             | chr4_109789254_109793743 | 3.482334 | 6.528802e-04 | 3.952335e-03 | Cdkn2c | 7.564842   | 4.603788e-14  | 1.029604e-13  | chr1  | 50656621  | 50662354  | chr1  | 50968694  | 50974637  | Lymphocyte count; Height                                                                                                                                                                                                                                                                                                                                                                                                                                                                                                                                                                                                                                                                                                                                                                                                                           |
| Astrocyte             | chr7_116029926_116034387 | 3.798360 | 1.252359e-03 | 6.930231e-03 | Sox6   | 17.668941  | 9.259437e-68  | 4.326505e-67  | chr11 | 16603094  | 16607614  | chr11 | 15966448  | 16476388  | White blood cell count                                                                                                                                                                                                                                                                                                                                                                                                                                                                                                                                                                                                                                                                                                                                                                                                                             |
| Astrocyte             | chr12_90738459_90740320  | 3.798360 | 1.252359e-03 | 6.930231e-03 | Dio2   | 48.128227  | 0.000000e+00  | 0.000000e+00  | chr14 | 80211649  | 80213350  | chr14 | 80197524  | 80231054  |                                                                                                                                                                                                                                                                                                                                                                                                                                                                                                                                                                                                                                                                                                                                                                                                                                                    |
| Astrocyte             | chr12_90738459_90740320  | 3.798360 | 1.252359e-03 | 6.930231e-03 | Cep128 | 10.048061  | 1.585817e-23  | 4.353672e-23  | chr14 | 80211649  | 80213350  | chr14 | 80496477  | 80939540  |                                                                                                                                                                                                                                                                                                                                                                                                                                                                                                                                                                                                                                                                                                                                                                                                                                                    |
| Astrocyte             | chr19_18902266_18902906  | 3.798360 | 1.252359e-03 | 6.930231e-03 | Rorb   | 39.974609  | 2.998225e-306 | 4.132123e-305 | chr9  | 74711074  | 74711715  | chr9  | 74497335  | 74687201  |                                                                                                                                                                                                                                                                                                                                                                                                                                                                                                                                                                                                                                                                                                                                                                                                                                                    |
| Astrocyte             | chr1_55225610_55226866   | 3.798360 | 1.252359e-03 | 6.930231e-03 | Rftn2  | 20.722839  | 2.299958e-91  | 1.298347e-90  | chr2  | 197674793 | 197676083 | chr2  | 197570802 | 197675860 | Body fat distribution (arm fat ratio); Body fat distribution (trunk fat ratio)                                                                                                                                                                                                                                                                                                                                                                                                                                                                                                                                                                                                                                                                                                                                                                     |
| Astrocyte             | chr12_53914480_53917497  | 3.798360 | 1.252359e-03 | 6.930231e-03 | Npas3  | 53.549488  | 0.000000e+00  | 0.000000e+00  | chr14 | 33640894  | 33643982  | chr14 | 32939252  | 33804176  |                                                                                                                                                                                                                                                                                                                                                                                                                                                                                                                                                                                                                                                                                                                                                                                                                                                    |
| Astrocyte             | chr4_154546502_154550898 | 3.798360 | 1.252359e-03 | 6.930231e-03 | Prdm16 | 15.261837  | 2.250185e-51  | 9.028050e-51  | chr1  | 3160800   | 3166648   | chr1  | 3069177   | 3438621   | Migraine; Principal component-derived dietary pattern 4                                                                                                                                                                                                                                                                                                                                                                                                                                                                                                                                                                                                                                                                                                                                                                                            |
| Astrocyte             | chr14_31780804_31782401  | 3.070367 | 1.423248e-03 | 7.596268e-03 | Btd    | 11.012485  | 7.095636e-28  | 2.114577e-27  | chr3  | 15797070  | 15798633  | chr3  | 15601351  | 15647634  |                                                                                                                                                                                                                                                                                                                                                                                                                                                                                                                                                                                                                                                                                                                                                                                                                                                    |
| Astrocyte             | chr12_53298464_53301782  | 4.458552 | 2.273285e-03 | 1.160791e-02 | Npas3  | 53.549488  | 0.000000e+00  | 0.000000e+00  | chr14 | 32993417  | 32999226  | chr14 | 32939252  | 33804176  |                                                                                                                                                                                                                                                                                                                                                                                                                                                                                                                                                                                                                                                                                                                                                                                                                                                    |
| Astrocyte             | chr8_94153018_94155646   | 3.219519 | 2.923460e-03 | 1.425384e-02 | Mt3    | 156.531128 | 0.000000e+00  | 0.000000e+00  | chr16 | 56589862  | 56592351  | chr16 | 56589354  | 56591088  |                                                                                                                                                                                                                                                                                                                                                                                                                                                                                                                                                                                                                                                                                                                                                                                                                                                    |
| Astrocyte             | chr3_121705823_121707208 | 3.219519 | 2.923460e-03 | 1.425384e-02 | F3     | 63.434364  | 0.000000e+00  | 0.000000e+00  | chr1  | 94584342  | 94585840  | chr1  | 94529175  | 94541857  |                                                                                                                                                                                                                                                                                                                                                                                                                                                                                                                                                                                                                                                                                                                                                                                                                                                    |
| Astrocyte             | chr6_22908664_22910715   | 3.476762 | 6.001854e-03 | 2.666834e-02 | Aass   | 12.359412  | 1.525315e-34  | 5.022563e-34  | chr7  | 121913216 | 121915571 | chr7  | 122073543 | 122144290 |                                                                                                                                                                                                                                                                                                                                                                                                                                                                                                                                                                                                                                                                                                                                                                                                                                                    |
| Astrocyte             | chr6_22908664_22910715   | 3.476762 | 6.001854e-03 | 2.666834e-02 | Piprz1 | 243.727875 | 0.000000e+00  | 0.000000e+00  | chr7  | 121913216 | 121915571 | chr7  | 121873104 | 122062036 |                                                                                                                                                                                                                                                                                                                                                                                                                                                                                                                                                                                                                                                                                                                                                                                                                                                    |
| Astrocyte             | chr2_83833412_83837135   | 3.476762 | 6.001854e-03 | 2.666834e-02 | Itgav  | 22.455799  | 1.326365e-106 | 8.246725e-106 | chr2  | 186718025 | 186721397 | chr2  | 186590062 | 186680902 |                                                                                                                                                                                                                                                                                                                                                                                                                                                                                                                                                                                                                                                                                                                                                                                                                                                    |
| Astrocyte             | chr19_18873177_18876012  | 3.476762 | 6.001854e-03 | 2.666834e-02 | Rorb   | 39.974609  | 2.998225e-306 | 4.132123e-305 | chr9  | 74739831  | 74743266  | chr9  | 74497335  | 74687201  | Cortical surface area; Vertex-wise cortical surface area                                                                                                                                                                                                                                                                                                                                                                                                                                                                                                                                                                                                                                                                                                                                                                                           |
| Neuroblast_SVZ        | chr18_23491771_23501860  | 4.033839 | 1.844968e-04 | 4.160403e-02 | Dtna   | -9.984835  | 5.373971e-21  | 3.447432e-20  | chr18 | 34703602  | 34715659  | chr18 | 34493289  | 34891844  |                                                                                                                                                                                                                                                                                                                                                                                                                                                                                                                                                                                                                                                                                                                                                                                                                                                    |
| Neuron_Cajal-Retzius  | chr4_109757395_109764176 | 5.972684 | 1.012198e-09 | 9.130028e-07 | Cdkn2c | -16.580017 | 1.835613e-61  | 4.655913e-60  | chr1  | 50699140  | 50706074  | chr1  | 50968694  | 50974637  |                                                                                                                                                                                                                                                                                                                                                                                                                                                                                                                                                                                                                                                                                                                                                                                                                                                    |
| Neuron_Cajal-Retzius  | chr7_70361940_70375137   | 4.168978 | 1.658746e-04 | 2.234425e-02 | Nr2f2  | 27.301947  | 1.630853e-104 | 1.063087e-102 | chr15 | 96317885  | 96330499  | chr15 | 96325927  | 96340263  | Oral cavity cancer; Externalizing behaviour (multivariate analysis); Oropharynx cancer and human papilloma virus 16 negative oropharyngeal cancer; Smoking initiation                                                                                                                                                                                                                                                                                                                                                                                                                                                                                                                                                                                                                                                                              |
| Neuron_Cajal-Retzius  | chr4_109983536_109986912 | 5.331851 | 1.981752e-04 | 2.234425e-02 | Dmrt2  | 10.020035  | 8.040660e-22  | 6.343073e-21  | chr1  | 50413992  | 50417752  | chr1  | 50417550  | 50423447  | Educational attainment (years of education); Educational attainment; Intelligence (MTAG); Cognitive ability (MTAG); Leisure sedentary behaviour (television watching); Major depressive disorder; Cognitive aspects of educational attainment; Smoking initiation (ever regular vs never regular) (MTAG); Cognitive traits (MTAG); Intelligence; Age at first sexual intercourse; Verbal-numerical reasoning; Brain morphology (MOSTest); Smoking initiation (ever regular vs never regular); Attention deficit hyperactivity disorder or autism spectrum disorder or intelligence (pleiotropy); Educational attainment (MTAG); Cognitive performance; Drinks per week; Cognitive performance (MTAG); Insomnia; Self-reported math ability; Self-reported math ability (MTAG); Highest math class taken (MTAG); Highest math class taken; Sunburns |
| Neuron_Excit_AON      | chr2_61648111_61670758   | 3.168187 | 3.490750e-14 | 3.148657e-11 | Tank   | 4.565320   | 5.350876e-06  | 1.690334e-05  | chr2  | 161229841 | 161254167 | chr2  | 161136954 | 161236172 | Automobile speeding propensity                                                                                                                                                                                                                                                                                                                                                                                                                                                                                                                                                                                                                                                                                                                                                                                                                     |
| Neuron_Excit_L2-4     | chr1_41761840_41767895   | 3.282111 | 2.696358e-06 | 3.040144e-04 | Pantr1 | 14.921903  | 6.755967e-50  | 3.801101e-49  | chr2  | 103894021 | 103897184 | chr2  | 88718240  | 88904105  | Educational attainment                                                                                                                                                                                                                                                                                                                                                                                                                                                                                                                                                                                                                                                                                                                                                                                                                             |
| Neuron_Excit_L2-4     | chr13_83141353_83148478  | 3.495487 | 3.141216e-06 | 3.148197e-04 | Mezf2c | 182.292236 | 0.000000e+00  | 0.000000e+00  | chr5  | 89235156  | 89249323  | chr5  | 88718240  | 88904105  | Macular thickness; Waist circumference adjusted for body mass index                                                                                                                                                                                                                                                                                                                                                                                                                                                                                                                                                                                                                                                                                                                                                                                |
| Neuron_Excit_L5_Mixed | chr7_66014128_66014532   | 3.737143 | 2.786909e-04 | 3.677499e-02 | Peskb  | -16.587570 | 2.263189e-61  | 3.313281e-60  | chr15 | 101337048 | 101337565 | chr15 | 101303927 | 101489984 |                                                                                                                                                                                                                                                                                                                                                                                                                                                                                                                                                                                                                                                                                                                                                                                                                                                    |
| Neuron_Granule_DG     | chr3_125405334_125410657 | 5.806064 | 1.011677e-04 | 1.380304e-02 | Ugt8a  | -23.040115 | 5.201659e-89  | 3.379286e-87  | chr4  | 115106106 | 115112630 | chr4  | 114827772 | 115113876 |                                                                                                                                                                                                                                                                                                                                                                                                                                                                                                                                                                                                                                                                                                                                                                                                                                                    |
| Neuron_Granule_DG     | chr3_125405334_125410657 | 5.806064 | 1.011677e-04 | 1.380304e-02 | Ndst4  | 4.497158   | 8.449939e-06  | 3.032315e-05  | chr4  | 115106106 | 115112630 | chr4  | 114827772 | 115113876 |                                                                                                                                                                                                                                                                                                                                                                                                                                                                                                                                                                                                                                                                                                                                                                                                                                                    |
| Neuron_Granule_DG     | chr1_50860999_50861403   | 4.356917 | 1.071190e-04 | 1.380304e-02 | Tmeff2 | 3.399986   | 7.231398e-04  | 1.952972e-03  | chr2  | 191949045 | 191949045 | chr2  | 191949045 | 192194933 |                                                                                                                                                                                                                                                                                                                                                                                                                                                                                                                                                                                                                                                                                                                                                                                                                                                    |

The columns are: cluster (cell type), peak name, logfoldchange of peaks, p-value of differential binding analysis, adjusted p-value of differential binding analysis, the paired gene name, score of differential gene analysis, p-value of differential gene analysis, adjusted p-value of differential gene analysis, human chromosome number after "lifiting over" the peak to hg38, human start site after "lifiting over" the peak to hg38, human end site after "lifiting over" the peak to hg38, human chromosome number after "lifiting over" the gene to hg38, human start site after "lifiting over" the gene to hg38, human end site after "lifiting over" the gene to hg38, GWAS information within the peak areas after "lifiting over" the peak to hg38.



4.3 3

Table3: Differentiated Results for GBM Data

| Peak                      | logfold-changes_peak | Pvalue_peak | Pvalue_adj_peak | Gene    | Score_gene | Pvalue_gene | Pvalue_adj_gene | Chr_liftover | Start_liftover | End_liftover | Chr_hg38 | Start_hg38 | End_hg38  | GWAS                                                                                                 |
|---------------------------|----------------------|-------------|-----------------|---------|------------|-------------|-----------------|--------------|----------------|--------------|----------|------------|-----------|------------------------------------------------------------------------------------------------------|
| chr1_174659622_174662521  | 5.652435             | 0.000000    | 0.000000        | Grem2   | -10.401831 | 0.000000    | 0.000000        | chr1         | 240280756      | 240283835    | chr1     | 240489572  | 240612162 | Coronary heart disease                                                                               |
| chr1_174917639_174921559  | 6.208699             | 0.000000    | 0.000000        | Grem2   | -10.401831 | 0.000000    | 0.000000        | chr1         | 240608636      | 240611870    | chr1     | 240489572  | 240612162 |                                                                                                      |
| chr2_93645657_93648162    | 5.189615             | 0.000002    | 0.000043        | Alx4    | -10.292504 | 0.000000    | 0.000000        | chr11        | 44303696       | 44306415     | chr11    | 44260727   | 44310166  | Gut microbiota (bacterial taxa, hurdle binary method)                                                |
| chr3_33140350_33142508    | 5.534632             | 0.000000    | 0.000002        | Pex5l   | -7.590236  | 0.000000    | 0.000000        | chr3         | 180033883      | 180036186    | chr3     | 179794958  | 180037053 |                                                                                                      |
| chr3_126498429_126499612  | 5.337659             | 0.000001    | 0.000012        | Arsj    | -6.281259  | 0.000000    | 0.000000        | chr4         | 113839066      | 113844568    | chr4     | 113900283  | 113979722 |                                                                                                      |
| chr3_126657669_126660188  | -5.397757            | 0.000001    | 0.000012        | Arsj    | -6.281259  | 0.000000    | 0.000000        | chr4         | 113683844      | 113686758    | chr4     | 113900283  | 113979722 |                                                                                                      |
| chr3_132085669_132092999  | 6.121213             | 0.000000    | 0.000000        | Dkk2    | -6.916087  | 0.000000    | 0.000000        | chr4         | 107029387      | 107035946    | chr4     | 106921801  | 107036296 |                                                                                                      |
| chr3_132093815_132106295  | 5.072335             | 0.000000    | 0.000000        | Dkk2    | -6.916087  | 0.000000    | 0.000000        | chr4         | 107015456      | 107028826    | chr4     | 106921801  | 107036296 |                                                                                                      |
| chr3_141699368_141702608  | 6.065565             | 0.000000    | 0.000000        | Bmpr1b  | -5.570116  | 0.000000    | 0.000000        | chr4         | 95306647       | 95309431     | chr4     | 94757976   | 95158450  |                                                                                                      |
| chr4_68535893_68538867    | 5.172571             | 0.000000    | 0.000000        | Brnp1   | -7.758307  | 0.000000    | 0.000000        | chr9         | 118993297      | 118996641    | chr9     | 119166629  | 119369461 |                                                                                                      |
| chr4_68545353_68551019    | 6.825275             | 0.000000    | 0.000000        | Brnp1   | -7.758307  | 0.000000    | 0.000000        | chr9         | 119002823      | 119008509    | chr9     | 119166629  | 119369461 |                                                                                                      |
| chr4_118022206_118024522  | -5.332271            | 0.000001    | 0.000022        | Artn    | 9.083650   | 0.000000    | 0.000000        | chr1         | 43824383       | 43825212     | chr1     | 43933319   | 43937240  |                                                                                                      |
| chr5_13001869_13003460    | 5.957213             | 0.000000    | 0.000000        | Sema3a  | -5.771471  | 0.000000    | 0.000000        | chr7         | 84314176       | 84318280     | chr7     | 83958342   | 84194901  |                                                                                                      |
| chr5_13001869_13003460    | 5.957213             | 0.000000    | 0.000000        | Sema3a  | -5.771471  | 0.000000    | 0.000000        | chr7         | 84314176       | 84318280     | chr7     | 83958342   | 84194901  |                                                                                                      |
| chr5_13276479_13283560    | 7.727895             | 0.000000    | 0.000000        | Sema3a  | -5.771471  | 0.000000    | 0.000000        | chr7         | 84314176       | 84318280     | chr7     | 83958342   | 84194901  |                                                                                                      |
| chr5_13276479_13283560    | 7.727895             | 0.000000    | 0.000000        | Sema3a  | -5.771471  | 0.000000    | 0.000000        | chr7         | 84314176       | 84318280     | chr7     | 83958342   | 84194901  |                                                                                                      |
| chr5_17080302_17082934    | 5.024623             | 0.000010    | 0.000156        | Hgf     | -7.513756  | 0.000000    | 0.000000        | chr7         | 81335127       | 81335733     | chr7     | 81699007   | 81770198  |                                                                                                      |
| chr5_28465271_28467276    | -5.397757            | 0.000001    | 0.000012        | Shh     | 5.565109   | 0.000000    | 0.000000        | chr7         | 155810616      | 155812624    | chr7     | 155799983  | 155812273 |                                                                                                      |
| chr5_38081825_38086331    | 6.088429             | 0.000000    | 0.000000        | Nsg1    | -5.086635  | 0.000000    | 0.000000        | chr4         | 4488485        | 4493470      | chr4     | 4386255    | 4419058   |                                                                                                      |
| chr7_56523378_56528436    | 6.721266             | 0.000000    | 0.000000        | Gabrg3  | -5.960560  | 0.000023    | 0.000132        | chr15        | 26971281       | 27533227     | chr15    | 26971281   | 27533227  |                                                                                                      |
| chr7_111875691_111878313  | 5.109476             | 0.000005    | 0.000082        | Galnt18 | -5.959958  | 0.000000    | 0.000000        | chr11        | 11723801       | 11725419     | chr11    | 11270873   | 11622014  |                                                                                                      |
| chr8_82329336_82331284    | 5.189615             | 0.000002    | 0.000043        | Il15    | -5.185933  | 0.000810    | 0.003267        | chr4         | 141733679      | 141736013    | chr4     | 141636595  | 141733987 |                                                                                                      |
| chr8_102781569_102784308  | 5.761340             | 0.000000    | 0.000000        | Cdh11   | -6.729272  | 0.000000    | 0.000000        | chr16        | 65118621       | 65121296     | chr16    | 64943752   | 65122137  |                                                                                                      |
| chr11_96341058_96343216   | 5.337659             | 0.000001    | 0.000012        | Hoxb3   | -6.433657  | 0.000001    | 0.000005        | chr17        | 48553538       | 48555622     | chr17    | 48548869   | 48582622  |                                                                                                      |
| chr11_96341058_96343216   | 5.337659             | 0.000001    | 0.000012        | Hoxb3   | -6.433657  | 0.000001    | 0.000005        | chr17        | 48553538       | 48555622     | chr17    | 48548869   | 48582622  |                                                                                                      |
| chr11_96354206_96355627   | 5.109476             | 0.000005    | 0.000082        | Hoxb2   | -6.351656  | 0.000003    | 0.000022        | chr17        | 48540790       | 48542479     | chr17    | 48542655   | 48545031  |                                                                                                      |
| chr11_96354206_96355627   | 5.109476             | 0.000005    | 0.000082        | Hoxb3   | -6.433657  | 0.000001    | 0.000005        | chr17        | 48540790       | 48542479     | chr17    | 48548869   | 48582622  |                                                                                                      |
| chr12_56506841_56514912   | -9.259195            | 0.000000    | 0.000000        | Nkx2-1  | 9.134857   | 0.000000    | 0.000000        | chr14        | 36491565       | 36499712     | chr14    | 36516398   | 36520225  | Nonsyndromic orofacial cleft x sex interaction; Nonsyndromic orofacial cleft x sex interaction (2df) |
| chr13_117409406_117414817 | -5.127606            | 0.000000    | 0.000000        | Emb     | -6.021510  | 0.000004    | 0.000025        | chr5         | 50396196       | 50441400     | chr5     | 50396196   | 50441400  |                                                                                                      |
| chr14_66104432_66107303   | 6.455571             | 0.000000    | 0.000000        | Ephx2   | -6.872942  | 0.000000    | 0.000001        | chr8         | 27506903       | 27511135     | chr8     | 27491001   | 27544922  |                                                                                                      |
| chr14_88460573_88463273   | 5.594736             | 0.000000    | 0.000001        | Pcdh20  | -6.097424  | 0.000012    | 0.000070        | chr13        | 61406547       | 61407676     | chr13    | 61409685   | 61415522  |                                                                                                      |
| chr14_88460573_88463273   | 5.594736             | 0.000000    | 0.000001        | Pcdh20  | -6.097424  | 0.000012    | 0.000070        | chr13        | 61406547       | 61407676     | chr13    | 61409685   | 61415522  |                                                                                                      |
| chr14_88898125_88900211   | -5.263671            | 0.000002    | 0.000040        | Pcdh20  | -6.097424  | 0.000012    | 0.000070        | chr13        | 61862674       | 61862983     | chr13    | 61409685   | 61415522  |                                                                                                      |
| chr15_11692586_11694713   | 6.046002             | 0.000000    | 0.000000        | Npr3    | -8.356128  | 0.000000    | 0.000000        | chr5         | 33023231       | 33024567     | chr5     | 32710636   | 32791724  |                                                                                                      |
| chr15_11692586_11694713   | 6.046002             | 0.000000    | 0.000000        | Npr3    | -8.356128  | 0.000000    | 0.000000        | chr5         | 33023231       | 33024567     | chr5     | 32710636   | 32791724  |                                                                                                      |
| chr15_11743634_11745456   | 6.922288             | 0.000000    | 0.000000        | Npr3    | -8.356128  | 0.000000    | 0.000000        | chr5         | 32929090       | 32932829     | chr5     | 32710636   | 32791724  |                                                                                                      |
| chr15_11743634_11745456   | 6.922288             | 0.000000    | 0.000000        | Npr3    | -8.356128  | 0.000000    | 0.000000        | chr5         | 32929090       | 32932829     | chr5     | 32710636   | 32791724  |                                                                                                      |
| chr15_11782997_11784930   | 5.957213             | 0.000000    | 0.000000        | Npr3    | -8.356128  | 0.000000    | 0.000000        | chr5         | 32864592       | 32866245     | chr5     | 32710636   | 32791724  |                                                                                                      |
| chr15_11782997_11784930   | 5.957213             | 0.000000    | 0.000000        | Npr3    | -8.356128  | 0.000000    | 0.000000        | chr5         | 32864592       | 32866245     | chr5     | 32710636   | 32791724  |                                                                                                      |
| chr18_53465649_53470088   | 5.761340             | 0.000000    | 0.000000        | Prdm6   | -9.029699  | 0.000000    | 0.000000        | chr5         | 123091173      | 123096087    | chr5     | 123089102  | 123194266 |                                                                                                      |
| chr19_59159949_59161669   | -6.094880            | 0.000000    | 0.000000        | Vax1    | 7.636277   | 0.000000    | 0.000000        | chr10        | 117127894      | 117129270    | chr10    | 117128520  | 117138301 |                                                                                                      |
| chr19_59163812_59165938   | -5.788022            | 0.000000    | 0.000000        | Vax1    | 7.636277   | 0.000000    | 0.000000        | chr10        | 117131583      | 117133776    | chr10    | 117128520  | 117138301 |                                                                                                      |
| chrX_93281556_93288401    | 5.093695             | 0.000000    | 0.000000        | Arx     | -5.380834  | 0.000000    | 0.000000        | chrX         | 25013967       | 25020980     | chrX     | 25003695   | 25015948  |                                                                                                      |
| chrY_1009018_1011799      | -5.686862            | 0.000000    | 0.000001        | Eif2s3y | 11.645099  | 0.000000    | 0.000000        | chrY         | 24054686       | 24057370     | chrY     | 13248378   | 13480670  |                                                                                                      |
| chrY_1243715_1246316      | -5.520433            | 0.000000    | 0.000003        | Uty     | 8.369064   | 0.000000    | 0.000000        | chrY         | 13478375       | 13480067     | chrY     | 12903998   | 12920478  |                                                                                                      |
| chrY_1243715_1246316      | -5.520433            | 0.000000    | 0.000003        | Ddx3y   | 11.525927  | 0.000000    | 0.000000        | chrY         | 13478375       | 13480067     | chrY     | 12903998   | 12920478  |                                                                                                      |
| chrY_1282482_1287504      | -5.191646            | 0.000004    | 0.000074        | Ddx3y   | 11.525927  | 0.000000    | 0.000000        | chrY         | 12903183       | 12909538     | chrY     | 12903998   | 12920478  |                                                                                                      |

The columns are: peak name, logfoldchange of peaks, p-value of differential binding analysis, adjusted p-value of differential binding analysis, the paired gene name, score of differential gene analysis, p-value of differential gene analysis, adjusted p-value of differential gene analysis, human chromosome number after "liftover" the peak to hg38, human start site after "liftover" the peak to hg38, human end site after "liftover" the peak to hg38, human chromosome number after "liftover" the gene to hg38, human start site after "liftover" the gene to hg38, human end site after "liftover" the gene to hg38, GWAS information within the peak areas after "liftover" the peak to hg38.

4.4 4

Table 4: Motifs Significantly Bounded in Males

| Motif Name                                                  | Consensus       | P-value     | Log P-value | q-value (Benjamini) | # of Target Sequences with Motif (of 585) | % of Target Sequences with Motif | # of Background Sequences with Motif (of 48633) | % of Background Sequences with Motif |
|-------------------------------------------------------------|-----------------|-------------|-------------|---------------------|-------------------------------------------|----------------------------------|-------------------------------------------------|--------------------------------------|
| Nrf2(bZIP)/Lymphoblast-Nrf2-ChIP-Seq(GSE37589)/Homer        | HTGCTGAGTCAT    | 1.00000e-10 | -24.030     | 0.0000              | 39.0                                      | 6.67%                            | 929.4                                           | 1.91%                                |
| NF-E2(bZIP)/K562-NFE2-ChIP-Seq(GSE31477)/Homer              | GATGACTCAGCA    | 1.00000e-09 | -21.300     | 0.0000              | 41.0                                      | 7.01%                            | 1115.3                                          | 2.29%                                |
| Bach1(bZIP)/K562-Bach1-ChIP-Seq(GSE31477)/Homer             | AWWNTGCTGAGTCAT | 1.00000e-08 | -19.210     | 0.0000              | 39.0                                      | 6.67%                            | 1105.7                                          | 2.27%                                |
| NFE2L2(bZIP)/HepG2-NFE2L2-ChIP-Seq(Encode)/Homer            | AWWWTGCTGAGTCAT | 1.00000e-07 | -17.550     | 0.0000              | 48.0                                      | 8.21%                            | 1636.5                                          | 3.36%                                |
| MafK(bZIP)/C2C12-MafK-ChIP-Seq(GSE36030)/Homer              | GCTGASTCAGCA    | 1.00000e-06 | -15.170     | 0.0000              | 97.0                                      | 16.58%                           | 4773.9                                          | 9.81%                                |
| Ets1-distal(ETS)/CD4+-PolII-ChIP-Seq(Barski_et_al)/Homer    | MACAGGAAGT      | 1.00000e-05 | -13.630     | 0.0000              | 116.0                                     | 19.83%                           | 6233.9                                          | 12.81%                               |
| Sox3(HMG)/NPC-Sox3-ChIP-Seq(GSE33059)/Homer                 | CCWTTGTGY       | 1.00000e-04 | -10.180     | 0.0009              | 434.0                                     | 74.19%                           | 32372.0                                         | 66.54%                               |
| Bapx1(Homeobox)/VertebralCol-Bapx1-ChIP-Seq(GSE36672)/Homer | TTRAGTGSYK      | 1.00000e-03 | -8.548      | 0.0043              | 467.0                                     | 79.83%                           | 35725.8                                         | 73.43%                               |
| LHX9(Homeobox)/Hct116-LHX9.V5-ChIP-Seq(GSE116822)/Homer     | NGCTAATTAG      | 1.00000e-03 | -7.670      | 0.0093              | 399.0                                     | 68.21%                           | 29938.8                                         | 61.54%                               |
| Nkx2.2(Homeobox)/NPC-Nkx2.2-ChIP-Seq(GSE61673)/Homer        | BTBRAGTGSN      | 1.00000e-03 | -7.623      | 0.0094              | 419.0                                     | 71.62%                           | 31690.5                                         | 65.14%                               |
| Sox10(HMG)/SciaticNerve-Sox3-ChIP-Seq(GSE35132)/Homer       | CCWTTGTYYB      | 1.00000e-03 | -7.534      | 0.0098              | 407.0                                     | 69.57%                           | 30669.3                                         | 63.04%                               |
| Lhx2(Homeobox)/HFSC-Lhx2-ChIP-Seq(GSE48068)/Homer           | TAATTAGN        | 1.00000e-03 | -7.244      | 0.0124              | 343.0                                     | 58.63%                           | 25288.8                                         | 51.98%                               |
| ZNF669(Zf)/HEK293-ZNF669.GFP-ChIP-Seq(GSE58341)/Homer       | GARTGGTCATCGCCC | 1.00000e-03 | -7.173      | 0.0125              | 24.0                                      | 4.10%                            | 959.3                                           | 1.97%                                |
| KLF14(Zf)/HEK293-KLF14.GFP-ChIP-Seq(GSE58341)/Homer         | RGKGGGCGKGGC    | 1.00000e-03 | -7.144      | 0.0125              | 297.0                                     | 50.77%                           | 21491.3                                         | 44.17%                               |
| Sox4(HMG)/proB-Sox4-ChIP-Seq(GSE50066)/Homer                | YCTTTGTTC       | 1.00000e-03 | -7.123      | 0.0125              | 255.0                                     | 43.59%                           | 18072.7                                         | 37.15%                               |
| TATA-Box(TBP)/Promoter/Homer                                | CCTTTTAWAGSC    | 1.00000e-03 | -7.031      | 0.0130              | 382.0                                     | 65.30%                           | 28658.5                                         | 58.91%                               |
| Bm1(POU,Homeobox)/NPC-Bm1-ChIP-Seq(GSE35496)/Homer          | TATGCWAATBAV    | 1.00000e-02 | -6.282      | 0.0249              | 134.0                                     | 22.91%                           | 8796.6                                          | 18.08%                               |
| Sox2(HMG)/mES-Sox2-ChIP-Seq(GSE11431)/Homer                 | BCCATTGTTC      | 1.00000e-02 | -6.215      | 0.0259              | 272.0                                     | 46.50%                           | 19720.1                                         | 40.53%                               |
| RUNX-AML(Runt)/CD4+-PolII-ChIP-Seq(Barski_et_al)/Homer      | GCTGTGGTTW      | 1.00000e-02 | -6.208      | 0.0259              | 212.0                                     | 36.24%                           | 14887.1                                         | 30.60%                               |
| Sp5(Zf)/mES-Sp5.Flag-ChIP-Seq(GSE72989)/Homer               | RGKGGGCGGAGC    | 1.00000e-02 | -6.201      | 0.0259              | 174.0                                     | 29.74%                           | 11896.8                                         | 24.45%                               |
| RUNX1(Runt)/Jurkat-RUNX1-ChIP-Seq(GSE29180)/Homer           | AAACCCACARM     | 1.00000e-02 | -5.829      | 0.0323              | 293.0                                     | 50.09%                           | 21565.6                                         | 44.33%                               |
| Elk4(ETS)/Hela-Elk4-ChIP-Seq(GSE31477)/Homer                | NRYTCCGGY       | 1.00000e-02 | -5.473      | 0.0447              | 117.0                                     | 20.00%                           | 7700.2                                          | 15.83%                               |
| CHR(?)Hela-CellCycle-Expression/Homer                       | SRGTTTCAA       | 1.00000e-02 | -5.305      | 0.0497              | 225.0                                     | 38.46%                           | 16202.3                                         | 33.30%                               |
| KLF3(Zf)/MEF-KlF3-ChIP-Seq(GSE44748)/Homer                  | NRGCCCRCCCHBNN  | 1.00000e-02 | -5.298      | 0.0497              | 100.0                                     | 17.09%                           | 6462.1                                          | 13.28%                               |

The columns are: motif name, consensus of the motif, p-value log p-value q-value (Benjamini), # of target sequences with Motif, % of target sequences with motif, # of background sequences with Motif, % of background sequences with motif.

4.5 5

Table 5: Motifs Significantly Bounded in Females

| Motif Name                                                               | Consensus             | P-value     | Log P-value | q-value (Benjamini) | # of Target Sequences with Motif (of 1009) | % of Target Sequences with Motif | # of Background Motif (of 48596) | % of Background Sequences with Motif |
|--------------------------------------------------------------------------|-----------------------|-------------|-------------|---------------------|--------------------------------------------|----------------------------------|----------------------------------|--------------------------------------|
| Chop(bZIP)/MEF-Chop-ChIP-Seq(GSE35681)/Homer                             | ATTGCATCAT            | 1.00000e-19 | -44.020     | 0.0000              | 197.0                                      | 19.52%                           | 4851.2                           | 9.98%                                |
| Atf4(bZIP)/MEF-Atf4-ChIP-Seq(GSE35681)/Homer                             | MTGATGCAAT            | 1.00000e-17 | -41.260     | 0.0000              | 228.0                                      | 22.60%                           | 6117.7                           | 12.59%                               |
| ISRE(IRF)/ThioMac-LPS-Expression(GSE23622)/Homer                         | AGTTTCASTTTC          | 1.00000e-16 | -38.060     | 0.0000              | 100.0                                      | 9.91%                            | 1872.5                           | 3.85%                                |
| IRF3(IRF)/BMDM-Irf3-ChIP-Seq(GSE67343)/Homer                             | AGTTTCAKTTC           | 1.00000e-13 | -30.290     | 0.0000              | 296.0                                      | 29.34%                           | 9507.9                           | 19.57%                               |
| IRF2(IRF)/Erythroblasts-Irf2-ChIP-Seq(GSE36985)/Homer                    | GAAASYGAAASY          | 1.00000e-12 | -28.510     | 0.0000              | 118.0                                      | 11.69%                           | 2788.7                           | 5.74%                                |
| IRF8(IRF)/BMDM-IRF8-ChIP-Seq(GSE77884)/Homer                             | GAAAGTAAAST           | 1.00000e-12 | -28.320     | 0.0000              | 255.0                                      | 25.27%                           | 7973.4                           | 16.41%                               |
| IRF1(IRF)/PBMC-IRF1-ChIP-Seq(GSE43036)/Homer                             | GAAAGTAAAGT           | 1.00000e-09 | -21.540     | 0.0000              | 147.0                                      | 14.57%                           | 4197.4                           | 8.64%                                |
| Rbpj1(?)/Panc1-Rbpj1-ChIP-Seq(GSE47549)/Homer                            | HTTCCASAG             | 1.00000e-07 | -17.720     | 0.0000              | 594.0                                      | 58.87%                           | 24396.6                          | 50.20%                               |
| CEBP:AP1(bZIP)/ThioMac-CEBPb-ChIP-Seq(GSE21512)/Homer                    | DRTGTTGCAA            | 1.00000e-07 | -16.770     | 0.0000              | 420.0                                      | 41.63%                           | 26299.1                          | 33.54%                               |
| TEAD1(TEAD)/HepG2-TEAD1-ChIP-Seq(Encode)/Homer                           | CYRCATTCCA            | 1.00000e-07 | -16.340     | 0.0000              | 498.0                                      | 49.36%                           | 19987.8                          | 41.13%                               |
| Zic3(Zf)/mES-Zic3-ChIP-Seq(GSE37889)/Homer                               | GGCCYCTGCTGDGH        | 1.00000e-06 | -15.340     | 0.0000              | 189.0                                      | 18.73%                           | 6339.3                           | 13.04%                               |
| PU.1-IRF8(ETS:IRF)/pDC-Irf8-ChIP-Seq(GSE66899)/Homer                     | GGAAGTAAAST           | 1.00000e-06 | -15.240     | 0.0000              | 147.0                                      | 14.57%                           | 4644.0                           | 9.56%                                |
| GABPA(ETS)/Jurkat-GABPA-ChIP-Seq(GSE17954)/Homer                         | RACCGGAAGT            | 1.00000e-05 | -13.440     | 0.0000              | 379.0                                      | 37.56%                           | 14873.2                          | 30.61%                               |
| Unknown-ESC-element(?) / mES-Nanog-ChIP-Seq(GSE11724)/Homer              | CACAGCAGGGGG          | 1.00000e-05 | -12.150     | 0.0001              | 223.0                                      | 22.10%                           | 8111.5                           | 16.69%                               |
| MeF2c(MADS)/GM12878-MeF2c-ChIP-Seq(GSE32465)/Homer                       | DCYAAAAATAGM          | 1.00000e-04 | -11.440     | 0.0002              | 337.0                                      | 33.40%                           | 13254.2                          | 27.27%                               |
| TEAD3(TEA)/HepG2-TEAD3-ChIP-Seq(Encode)/Homer                            | TRCATTCAG             | 1.00000e-04 | -11.430     | 0.0002              | 547.0                                      | 54.21%                           | 23074.9                          | 47.48%                               |
| NF1-halfsite(CTF)/LNCaP-NF1-ChIP-Seq(Unpublished)/Homer                  | YTGCCAAAG             | 1.00000e-04 | -11.190     | 0.0002              | 578.0                                      | 57.28%                           | 24613.8                          | 50.65%                               |
| TEAD(TEA)/Fibroblast-PU.1-ChIP-Seq(Unpublished)/Homer                    | YCWGGAATGY            | 1.00000e-04 | -10.680     | 0.0004              | 383.0                                      | 37.96%                           | 15476.2                          | 31.85%                               |
| TEAD4(TEA)/Tropoblast-Tead4-ChIP-Seq(GSE37350)/Homer                     | CCWGGAAATGY           | 1.00000e-04 | -10.420     | 0.0005              | 409.0                                      | 40.54%                           | 16723.6                          | 34.41%                               |
| Smad4(MAD)/ESC-SMAD4-ChIP-Seq(GSE29422)/Homer                            | VBSYGTCTGG            | 1.00000e-04 | -10.240     | 0.0005              | 566.0                                      | 56.10%                           | 24201.5                          | 49.80%                               |
| CEBP:CEBP(bZIP)/MEF-Chop-ChIP-Seq(GSE35681)/Homer                        | NTNATGCAAYMNNHT-GMAAY | 1.00000e-04 | -9.790      | 0.0007              | 115.0                                      | 11.40%                           | 3832.0                           | 7.89%                                |
| Pitx1:Ebox(Homeobox,bHLH)/Hindlimb-Pitx1-ChIP-Seq(GSE41591)/Homer        | YTAATTRAWWCCA-GATGT   | 1.00000e-03 | -9.188      | 0.0013              | 158.0                                      | 15.66%                           | 5685.8                           | 11.70%                               |
| Dlx3(Homeobox)/Kerainocytes-Dlx3-ChIP-Seq(GSE89884)/Homer                | NDGTAATTAC            | 1.00000e-03 | -8.785      | 0.0019              | 456.0                                      | 45.19%                           | 19220.6                          | 39.55%                               |
| PAX6(Paired,Homeobox)/Forebrain-Pax6-ChIP-Seq(GSE66961)/Homer            | NGTGTTCAVT-SAAGCGKAAA | 1.00000e-03 | -8.430      | 0.0026              | 70.0                                       | 6.94%                            | 2161.0                           | 4.45%                                |
| CREB5(bZIP)/LNCaP-CREB5.V5-ChIP-Seq(GSE137775)/Homer                     | VVATGACGTCAT          | 1.00000e-03 | -8.229      | 0.0029              | 206.0                                      | 20.42%                           | 7887.2                           | 16.23%                               |
| MYB(HTH)/ERMYB-Myb-ChIPSeq(GSE22095)/Homer                               | GGCVGTTR              | 1.00000e-03 | -7.874      | 0.0041              | 659.0                                      | 65.31%                           | 29212.3                          | 60.11%                               |
| TEAD2(TEA)/Py2T-Tead2-ChIP-Seq(GSE55709)/Homer                           | CCWGGAAATGY           | 1.00000e-03 | -7.798      | 0.0043              | 282.0                                      | 27.95%                           | 11351.1                          | 23.36%                               |
| ETV1(ETS)/GIST48-ETV1-ChIP-Seq(GSE22441)/Homer                           | AACCCGGAAGT           | 1.00000e-03 | -7.698      | 0.0046              | 516.0                                      | 51.14%                           | 22294.4                          | 45.88%                               |
| AMYB(HTH)/Testes-AMYB-ChIP-Seq(GSE44588)/Homer                           | TGGCAGTTGG            | 1.00000e-03 | -7.598      | 0.0050              | 600.0                                      | 59.46%                           | 26375.0                          | 54.27%                               |
| CarG(MADS)/PTEIR-Srf-ChIP-Seq(Sullivan_et_al.)/Homer                     | CCATATATGGNM          | 1.00000e-03 | -7.474      | 0.0056              | 183.0                                      | 18.14%                           | 6990.5                           | 14.38%                               |
| STAT4(Stat)/CD4-Stat4-ChIP-Seq(GSE22104)/Homer                           | NYTTCWGGAAAR          | 1.00000e-03 | -7.305      | 0.0063              | 484.0                                      | 47.97%                           | 20850.1                          | 42.91%                               |
| NFIL3(bZIP)/HepG2-NFIL3-ChIP-Seq(Encode)/Homer                           | VTTACGTAAAYNNNNN      | 1.00000e-03 | -7.192      | 0.0068              | 388.0                                      | 38.45%                           | 16347.3                          | 33.64%                               |
| HLF(bZIP)/HSC-HLF-Flag-ChIP-Seq(GSE69817)/Homer                          | RTTATGYAAB            | 1.00000e-03 | -7.106      | 0.0072              | 483.0                                      | 47.87%                           | 20846.8                          | 42.90%                               |
| Six2(Homeobox)/NephronProgenitor-Six2-ChIP-Seq(GSE39837)/Homer           | GWAAYHTGAKMC          | 1.00000e-02 | -6.904      | 0.0087              | 518.0                                      | 51.34%                           | 22564.5                          | 46.43%                               |
| Elf4(ETS)/BMDM-Elf4-ChIP-Seq(GSE88699)/Homer                             | ACTTCKGKGT            | 1.00000e-02 | -6.881      | 0.0087              | 421.0                                      | 41.72%                           | 17960.0                          | 36.96%                               |
| Zic3(Zf)/Cerebellum-ZIC1.2-ChIP-Seq(GSE60731)/Homer                      | CCTGCTGAGH            | 1.00000e-02 | -6.835      | 0.0089              | 309.0                                      | 30.62%                           | 12762.1                          | 26.26%                               |
| NfkB-p65-Rel(RHD)/ThioMac-LPS-Expression(GSE23622)/Homer                 | GGAAATTTCC            | 1.00000e-02 | -6.800      | 0.0089              | 34.0                                       | 3.37%                            | 917.9                            | 1.89%                                |
| EBF1(EBF)/Near-E2A-ChIP-Seq(GSE21512)/Homer                              | GTCCCCWGGGGA          | 1.00000e-02 | -6.654      | 0.0101              | 310.0                                      | 30.72%                           | 12844.1                          | 26.43%                               |
| MeF2a(MADS)/HL1-Mef2a.biotin-ChIP-Seq(GSE21529)/Homer                    | CYAAAAATAG            | 1.00000e-02 | -6.569      | 0.0108              | 278.0                                      | 27.55%                           | 11396.8                          | 23.45%                               |
| PU.1-IRF(ETS:IRF)/Bcell-PU.1-ChIP-Seq(GSE21512)/Homer                    | MGGAAGTGA AAC         | 1.00000e-02 | -6.543      | 0.0109              | 599.0                                      | 59.37%                           | 26563.8                          | 54.66%                               |
| IRF4(IRF)/GM12878-IRF4-ChIP-Seq(GSE32465)/Homer                          | ACTGAAACCA            | 1.00000e-02 | -6.485      | 0.0114              | 266.0                                      | 26.36%                           | 10866.8                          | 22.36%                               |
| Zic2(Zf)/ESC-Zic2-ChIP-Seq(SRP197560)/Homer                              | CHCAGCRGGRG           | 1.00000e-02 | -6.257      | 0.0138              | 140.0                                      | 13.88%                           | 5296.3                           | 10.90%                               |
| Elk1(ETS)/Hela-Elk1-ChIP-Seq(GSE31477)/Homer                             | HACTTCCGGY            | 1.00000e-02 | -6.215      | 0.0142              | 183.0                                      | 18.14%                           | 7187.3                           | 14.79%                               |
| Smad2(MAD)/ES-SMAD2-ChIP-Seq(GSE29422)/Homer                             | CTGTCTGG              | 1.00000e-02 | -6.069      | 0.0162              | 545.0                                      | 54.01%                           | 24059.7                          | 49.51%                               |
| MeF2d(MADS)/Retina-Mef2d-ChIP-Seq(GSE61391)/Homer                        | GCTATTTTAGC           | 1.00000e-02 | -6.020      | 0.0167              | 136.0                                      | 13.48%                           | 5157.9                           | 10.61%                               |
| c-Jun-CEBP(bZIP)/K562-cJun-ChIP-Seq(GSE31477)/Homer                      | ATGACGTATCY           | 1.00000e-02 | -6.000      | 0.0168              | 133.0                                      | 13.18%                           | 5030.2                           | 10.35%                               |
| NFAT:AP1(RHD,bZIP)/Jurkat-NFATC1-ChIP-Seq(Jolma_et_al.)/Homer            | SARTGGAAAAWRT-GAGTCAB | 1.00000e-02 | -5.920      | 0.0179              | 110.0                                      | 10.90%                           | 4053.8                           | 8.34%                                |
| Prop1(Homeobox)/GHFT1-PROP1.biotin-ChIP-Seq(GSE77302)/Homer              | NTAATBNAATTA          | 1.00000e-02 | -5.844      | 0.0189              | 446.0                                      | 44.20%                           | 19380.0                          | 39.88%                               |
| IRF:BATF(IRF:bZIP)/pDC-Irf8-ChIP-Seq(GSE66899)/Homer                     | CTTTCANTATGACTV       | 1.00000e-02 | -5.825      | 0.0189              | 98.0                                       | 9.71%                            | 3556.1                           | 7.32%                                |
| PAX3-FKHR-fusion(Paired,Homeobox)/Rh4-PAX3-FKHR-ChIP-Seq(GSE19063)/Homer | ACCRTGACTAATTNN       | 1.00000e-02 | -5.789      | 0.0192              | 152.0                                      | 15.06%                           | 5890.0                           | 12.12%                               |
| STAT6(Stat)/Macrophage-Stat6-ChIP-Seq(GSE38377)/Homer                    | TTCCCKNAGAA           | 1.00000e-02 | -5.721      | 0.0203              | 305.0                                      | 30.23%                           | 12810.3                          | 26.36%                               |
| Hoxd11(Homeobox)/ChickenMSG-Hoxd11.Flag-ChIP-Seq(GSE86088)/Homer         | VGCCATAAAA            | 1.00000e-02 | -5.700      | 0.0204              | 895.0                                      | 88.70%                           | 41669.0                          | 85.75%                               |
| STAT6(Stat)/CD4-Stat6-ChIP-Seq(GSE22104)/Homer                           | ABTTCYRRGAA           | 1.00000e-02 | -5.632      | 0.0216              | 308.0                                      | 30.53%                           | 12968.7                          | 26.69%                               |
| DLX1(Homeobox)/BasalGanglia-Dlx1-ChIP-Seq(GSE124936)/Homer               | NSNNTAATTA            | 1.00000e-02 | -5.582      | 0.0224              | 684.0                                      | 67.79%                           | 30969.0                          | 63.73%                               |
| ETS:E-box(ETS,bHLH)/HPC7-Scf-ChIP-Seq(GSE22178)/Homer                    | AGGAARCAAGCTG         | 1.00000e-02 | -5.399      | 0.0265              | 50.0                                       | 4.96%                            | 1625.2                           | 3.34%                                |
| PU.1(ETS)/ThioMac-PU.1-ChIP-Seq(GSE21512)/Homer                          | AGAGGAAGTG            | 1.00000e-02 | -5.341      | 0.0277              | 240.0                                      | 23.79%                           | 9912.9                           | 20.40%                               |
| Stat3(Stat)/mES-Stat3-ChIP-Seq(GSE11431)/Homer                           | CTTCCGGGAA            | 1.00000e-02 | -5.293      | 0.0287              | 227.0                                      | 22.50%                           | 9331.1                           | 19.20%                               |
| EHF(ETS)/LoVo-EHF-ChIP-Seq(GSE49402)/Homer                               | AVCAGGAAGT            | 1.00000e-02 | -4.905      | 0.0413              | 543.0                                      | 53.82%                           | 24265.3                          | 49.93%                               |
| NfkB-p65(RHD)/GM12878-p65-ChIP-Seq(GSE19485)/Homer                       | WGGGGATTTCCC          | 1.00000e-02 | -4.861      | 0.0426              | 206.0                                      | 20.42%                           | 8468.5                           | 17.43%                               |
| Brm2(POU,Homeobox)/NPC-Brm2-ChIP-Seq(GSE35496)/Homer                     | ATGAATATTC            | 1.00000e-02 | -4.829      | 0.0434              | 86.0                                       | 8.52%                            | 3175.7                           | 6.53%                                |
| BMYB(HTH)/Hela-BMYB-ChIP-Seq(GSE27030)/Homer                             | NHAACBGYYV            | 1.00000e-02 | -4.779      | 0.0451              | 591.0                                      | 58.57%                           | 26624.5                          | 54.79%                               |

The columns are: motif name, consensus of the motif, p-value log p-value q-value (Benjamini), # of target sequences with Motif, % of target sequences with motif, # of background sequences with Motif, % of background sequences with motif.

4.6 6

Table 6: Differentiated Results for Yeast Data

| Peak                  | group       | logfoldchanges | pvalues      | footprint_start | footprint_end | Gene Name1 | log2_ratio_GCR2_1 | log2_ratio_TYE7_1 | M_value_1  | p_value_1   | Gene Name2 | log2_ratio_GCR2_1 | log2_ratio_TYE7_1 | M_value_2 | p_value_2    |
|-----------------------|-------------|----------------|--------------|-----------------|---------------|------------|-------------------|-------------------|------------|-------------|------------|-------------------|-------------------|-----------|--------------|
| chrI_71058_71450      | TYE7        | 2.784531       | 1.953979e-07 | 71216           | 71400         | CDC19      | 1.298305          |                   |            |             | CYC3       |                   |                   |           |              |
| chrII_613940_614505   | TYE7        | 5.382557       | 4.503557e-38 | 614133          | 614356        | PGI1       | 1.168496          | 1.236167          | -1.2954679 | 7.55187e-30 | TAF5       |                   |                   |           |              |
| chrII_614793_615361   | TYE7        | 4.959104       | 1.137108e-18 | 615046          | 615270        | TAF5       |                   |                   |            |             | PGI1       | 1.168496          | 1.236167          |           |              |
| chrIII_137273_137488  | TYE7        | 1.820730       | 3.459797e-02 | 137342          | 137398        | PGK1       | 2.180786          | 2.593547          |            |             | ADP1       |                   |                   |           |              |
| chrIX_254382_254905   | TYE7        | 1.666128       | 1.254026e-11 | 254516          | 254741        | RPL34B     |                   |                   |            |             | VHR1       |                   |                   |           |              |
| chrV_498142_498323    | TYE7        | 1.727651       | 5.307259e-02 | 498142          | 498323        | SPT2       |                   |                   |            |             | RAD4       |                   |                   |           |              |
| chrV_544670_545587    | TYE7        | 3.728325       | 9.272983e-33 | 545118          | 545407        | ECM32      |                   |                   |            |             | BMH1       |                   |                   |           |              |
| chrVII_883857_884257  | TYE7        | 3.606330       | 1.927126e-70 | 884080          | 884176        | TDH3       | 1.070149          | 1.794388          |            |             | PDX1       |                   |                   |           |              |
| chrVII_999899_1001006 | TYE7        | 2.295043       | 6.436514e-40 | 1000238         | 1000631       | ENO1       | 2.635987          | 2.795574          | -1.424761  | 0.0         | PUP2       |                   |                   |           |              |
| chrVIII_450860_451208 | TYE7        | 6.446487       | 2.321509e-28 | 450990          | 451068        | SPC97      |                   |                   |            |             | ENO2       | 2.270574          | 1.996884          | -1.570186 | 7.988330e-14 |
| chrVIII_549242_549430 | TYE7        | 0.313615       | 6.755711e-01 | 549320          | 549377        | PHO12      |                   |                   |            |             | IMD2       |                   |                   | 1.627560  | 0.000000e+00 |
| chrX_454688_455338    | TYE7        | 3.949230       | 2.108841e-51 | 454946          | 455020        | TDH2       | 2.091124          | 2.408665          |            |             | MET3       |                   |                   |           |              |
| chrXI_164749_164897   | TYE7        | 3.724329       | 4.839595e-04 | 164749          | 164897        | GPM1       | 2.892607          | 2.502229          | -2.781464  | 0.0         | MCR1       |                   |                   |           |              |
| chrXI_327288_327611   | TYE7        | 1.728583       | 2.634327e-07 | 327411          | 327481        | FBA1       | 1.682776          | 1.640464          |            |             | MPE1       |                   |                   |           |              |
| chrXII_220643_220821  | TYE7        | 2.724692       | 5.932963e-02 | 220643          | 220821        | PAU23      |                   |                   |            |             | COX12      |                   |                   |           |              |
| chrXII_234178_234860  | TYE7        | 1.181715       | 2.260771e-07 | 234387          | 234786        | PDC1       |                   |                   |            |             | STU2       |                   |                   |           |              |
| chrXIII_650657_651279 | TYE7        | 0.842179       | 6.521443e-04 | 650826          | 651158        | HAP1       |                   |                   |            |             | NDL1       |                   |                   |           |              |
| chrXIII_674979_675319 | TYE7        | 2.503483       | 5.556749e-18 | 674979          | 675319        | PFK2       | 1.045008          | 1.002961          |            |             | HFA1       |                   |                   |           |              |
| chrXV_160747_161147   | TYE7        | 3.246710       | 4.388851e-07 | 160917          | 161116        | ADH1       | 2.309545          | 2.368507          |            |             | PHM7       |                   |                   |           |              |
| chrXV_970959_971080   | TYE7        | 0.576370       | 5.822512e-01 | 971080          | 971080        | RPA190     |                   |                   |            |             | TYE7       |                   |                   |           |              |
| chrXVI_411349_411915  | TYE7        | 4.133628       | 5.321212e-19 | 411528          | 411713        | GP2        |                   |                   |            |             | GCR1       | 1.986930          | 5.472818          | 1.326491  | 9.292210e-29 |
| chrXVI_412048_412354  | TYE7        | 13.863855      | 2.628075e-17 | 412163          | 412233        | GCR1       | 1.986930          | 1.801998          |            |             | GP2        |                   |                   |           |              |
| chrI_229758_229966    | TYE7_gcr2ko | 1.347771       | 2.715033e-03 | 229803          | 229906        | PHO11      |                   |                   |            |             | FLO1       |                   |                   |           |              |
| chrI_68120_68335      | TYE7_gcr2ko | 0.914803       | 1.150768e-01 | 68246           | 68324         | CYC3       |                   |                   |            |             | CLN3       |                   |                   |           |              |
| chrII_221245_221577   | TYE7_gcr2ko | 2.133472       | 9.539305e-11 | 221449          | 221557        | PDR3       |                   |                   |            |             | LDB7       |                   |                   |           |              |
| chrII_260413_260575   | TYE7_gcr2ko | 1.123237       | 8.061584e-02 | 260466          | 260535        | IPP1       |                   |                   |            |             | HHT1       |                   |                   |           |              |
| chrII_29937_30481     | TYE7_gcr2ko | 0.960776       | 5.032881e-03 | 30129           | 30410         | ECM21      |                   |                   |            |             | SFT2       |                   |                   |           |              |
| chrII_455444_455788   | TYE7_gcr2ko | 4.493130       | 1.004659e-05 | 455557          | 455688        | AIM3       |                   |                   |            |             | IML3       |                   |                   |           |              |
| chrII_533304_533666   | TYE7_gcr2ko | 3.800928       | 2.132744e-11 | 533329          | 533500        | ADH5       |                   | 1.361025          | 1.538598   | 0.0         | SUP45      |                   |                   |           |              |
| chrIII_50464_50773    | TYE7_gcr2ko | 0.745053       | 5.691017e-02 | 50528           | 50645         | GLK1       |                   | 1.208995          |            |             | PDI1       |                   |                   |           |              |
| chrIII_68547_68827    | TYE7_gcr2ko | 1.137314       | 3.027997e-03 | 68634           | 68742         | BIK1       |                   |                   |            |             | HIS4       |                   |                   |           |              |
| chrIV_1270863_1270994 | TYE7_gcr2ko | 12.035796      | 2.517398e-06 | 1270863         | 1270994       | URH1       |                   |                   |            |             | HPT1       |                   |                   |           |              |
| chrIV_1476711_1477076 | TYE7_gcr2ko | 1.078203       | 9.265489e-02 | 1476832         | 1476955       | GRH1       |                   |                   |            |             | EM12       |                   |                   |           |              |
| chrIV_215708_216063   | TYE7_gcr2ko | 3.480023       | 3.447024e-20 | 215806          | 215959        | RGT2       |                   |                   |            |             | ARF2       |                   |                   |           |              |
| chrIV_314944_315311   | TYE7_gcr2ko | 2.051902       | 2.535867e-04 | 315108          | 315190        | MDH3       |                   |                   |            |             | MRK1       |                   |                   |           |              |
| chrIV_366331_366464   | TYE7_gcr2ko | 1.591946       | 7.600754e-02 | 366331          | 366464        | STP4       |                   |                   |            |             | KNH1       |                   |                   |           |              |
| chrIV_413655_413831   | TYE7_gcr2ko | 2.006380       | 3.227108e-02 | 413655          | 413831        | GPM2       |                   | 1.482985          | 1.001564   | 0.0         | GPD1       |                   |                   |           |              |
| chrIV_803215_803664   | TYE7_gcr2ko | 2.762052       | 1.002192e-06 | 803360          | 803582        | SEC7       |                   |                   |            |             | HSP42      |                   |                   |           |              |
| chrIV_927099_927255   | TYE7_gcr2ko | 11.550507      | 1.005197e-04 | 927099          | 927255        | COX20      |                   |                   |            |             | HEM1       |                   |                   |           |              |
| chrIV_955079_955456   | TYE7_gcr2ko | 1.158595       | 1.677631e-03 | 955191          | 955295        | TRS23      |                   |                   |            |             | VHS1       |                   |                   |           |              |
| chrIV_981412_981615   | TYE7_gcr2ko | 1.007892       | 8.040092e-02 | 981480          | 981562        | EXG2       |                   |                   |            |             | SWM1       |                   |                   |           |              |
| chrIV_981781_982057   | TYE7_gcr2ko | 0.899775       | 4.807948e-05 | 981911          | 981978        | EXG2       |                   |                   |            |             | SWM1       |                   |                   |           |              |
| chrV_291305_291670    | TYE7_gcr2ko | 2.236300       | 4.226114e-05 | 291407          | 291609        | RGH1       |                   |                   |            |             | MOT2       |                   |                   |           |              |
| chrV_311589_311898    | TYE7_gcr2ko | 2.399778       | 7.190005e-06 | 311698          | 311856        | PTP3       |                   |                   |            |             | YOS1       |                   |                   |           |              |
| chrVII_14054_15155    | TYE7_gcr2ko | 0.245971       | 6.077501e-03 | 14500           | 14837         | MNT2       |                   |                   |            |             | ADH4       |                   |                   |           |              |
| chrVII_567315_567563  | TYE7_gcr2ko | 0.123640       | 8.551552e-01 | 567380          | 567492        | ORM1       |                   |                   |            |             | ACB1       |                   |                   |           |              |
| chrVII_574203_574357  | TYE7_gcr2ko | 1.592754       | 1.697728e-03 | 574203          | 574357        | KSS1       |                   |                   |            |             | BUD9       |                   |                   |           |              |
| chrVII_625218_625597  | TYE7_gcr2ko | 3.177404       | 7.027647e-14 | 625385          | 625509        | ART5       |                   |                   |            |             | ROM1       |                   |                   |           |              |
| chrVIII_548599_548842 | TYE7_gcr2ko | 1.415932       | 5.508430e-03 | 548670          | 548761        | PHO12      |                   |                   |            |             | IMD2       |                   |                   | 1.627560  | 0.000000e+00 |
| chrX_337351_338085    | TYE7_gcr2ko | 0.883445       | 3.808735e-18 | 337611          | 337820        | TDH1       | 1.968924          | 3.133345          | -1.115719  | 0.000004    | PEP8       |                   |                   |           |              |
| chrXI_308326_308525   | TYE7_gcr2ko | 0.914235       | 4.978495e-01 | 308326          | 308525        | NUP100     |                   |                   |            |             | YNK1       |                   |                   |           |              |
| chrXI_381717_381964   | TYE7_gcr2ko | 0.330000       | 6.645344e-01 | 381793          | 381878        | IXR1       |                   |                   |            |             | MAE1       |                   |                   |           |              |
| chrXI_384529_384715   | TYE7_gcr2ko | 1.399387       | 1.283071e-01 | 384529          | 384715        | MAE1       |                   |                   |            |             | TFA1       |                   |                   |           |              |
| chrXIII_184375_184617 | TYE7_gcr2ko | 0.592995       | 2.671287e-01 | 184439          | 184549        | PRP39      |                   |                   |            |             | PRM6       |                   |                   |           |              |
| chrXIII_361934_362209 | TYE7_gcr2ko | 2.134604       | 8.382418e-21 | 362045          | 362141        | NUP116     |                   |                   |            |             | CSM3       |                   |                   |           |              |
| chrXIII_362321_362629 | TYE7_gcr2ko | 1.688819       | 3.481021e-13 | 362400          | 362485        | NUP116     |                   |                   |            |             | CSM3       |                   |                   |           |              |
| chrXIII_773716_774065 | TYE7_gcr2ko | 2.040118       | 1.806886e-05 | 773809          | 773951        | GTO3       |                   |                   |            |             | HOR7       |                   |                   |           |              |
| chrXIV_101357_102062  | TYE7_gcr2ko | 1.487317       | 5.251183e-18 | 101589          | 101913        | MRPL10     |                   |                   |            |             | WSC2       |                   |                   |           |              |
| chrXIV_301779_302150  | TYE7_gcr2ko | 4.589684       | 3.215739e-11 | 301870          | 302016        | RPS3       |                   |                   |            |             | RHO5       |                   |                   |           |              |
| chrXIV_519627_520135  | TYE7_gcr2ko | 0.126028       | 5.065225e-01 | 519788          | 520004        | POR1       |                   |                   |            |             | OCA2       |                   |                   |           |              |
| chrXIV_567177_567791  | TYE7_gcr2ko | 0.943612       | 1.085177e-05 | 567298          | 567657        | NCE103     |                   |                   |            |             | SIW14      |                   |                   |           |              |
| chrXV_117912_118160   | TYE7_gcr2ko | 0.136291       | 6.403453e-01 | 117981          | 118082        | NDJ1       |                   | 1.051371          | 1.205167   | 0.0         | WSC3       |                   |                   |           |              |
| chrXV_216457_216739   | TYE7_gcr2ko | 0.785741       | 6.482490e-03 | 216578          | 216655        | MAM3       |                   |                   |            |             | GPD2       |                   |                   |           |              |
| chrXV_304395_304786   | TYE7_gcr2ko | 3.399200       | 5.453564e-10 | 304540          | 304745        | HTZ1       |                   |                   |            |             | PLB3       |                   |                   |           |              |
| chrXV_670788_671140   | TYE7_gcr2ko | 1.762657       | 2.358717e-04 | 670919          | 671048        | GAC1       |                   |                   |            |             | SYC1       |                   |                   |           |              |
| chrXV_709169_709425   | TYE7_gcr2ko | 1.214541       | 3.026343e-05 | 709267          | 709349        | PEX27      |                   |                   |            |             | TOA1       |                   |                   |           |              |
| chrXV_987325_988055   | TYE7_gcr2ko | 0.567374       | 2.918835e-03 | 987523          | 987900        | PUT4       |                   |                   |            |             | PKY2       |                   |                   |           |              |
| chrXV_988153_988367   | TYE7_gcr2ko | 1.078203       | 9.265489e-02 | 988214          | 988319        | PUT4       |                   |                   |            |             | CIN1       |                   |                   |           |              |
| chrXVI_855654_856341  | TYE7_gcr2ko | 1.112779       | 2.739031e-23 | 855800          | 856103        | KRE6       |                   |                   |            |             | GPH1       |                   |                   |           |              |

The columns are: peak name, the condition in which the peak is differentiated bound, logfoldchange of binding (positive means more tightly bound in WT yeast, negative means more tightly bound in gcr2delta yeast), p-value of differential binding analysis, the starting position of footprint analysis, the ending position of

footprint analysis, the name of the closest gene1, log2 ratio of the knockdown *gcr2Δ* for gene1 (Hackett et al., 2020), log2 ratio of the knockdown Tye7p for gene1 (Hackett et al., 2020), the M value (log2 expression ratio) of the *gcr2Δ* knockdown data for gene1 (Kemmeren et al., 2014), the p-value of the *gcr2Δ* knockdown data for gene 1 (Kemmeren et al., 2014), the name of the second closest gene2, log2 ratio of the knockdown *gcr2Δ* for gene2 (Hackett et al., 2020), log2 ratio of the knockdown Tye7p for gene2 (Hackett et al., 2020), the M value (log2 expression ratio) of the *gcr2Δ* knockdown data for gene2 (Kemmeren et al., 2014), the p-value of the *gcr2Δ* knockdown data for gene 2 (Kemmeren et al., 2014).

Table 7: Barcoded PB\_SRT\_Puro (pRM 1892)

| Name            | Sequence                                                                                        | Purification    | Note                                                                               |
|-----------------|-------------------------------------------------------------------------------------------------|-----------------|------------------------------------------------------------------------------------|
| SMART_dT18VN    | AAGCAGTGGTATCAACGCAGAGTACGTTTTTTTTTTTTTTTTTTTTTTTTTTTTTTTTTTTTTTTT                              | Standard desalt | RT primer for bulk RNA calling card recovery                                       |
| SMART_          | AAGCAGTGGTATCAACGCAGAGT                                                                         | Standard desalt | PCR primer for bulk RNA calling card amplification                                 |
| SRT_PAC_F1      | CAACCTCCCCTTCTACGAGC                                                                            | Standard desalt | Puromycin marker in SRT                                                            |
| Raff_ACTB_F     | CCTCGCCTTGCCGATCCG                                                                              | Standard desalt | Human ACTB primer (for RT control)                                                 |
| Raff_ACTB_R     | GGATCTTCATGAGGTAGTCAGTCAGGTCC                                                                   | Standard desalt | Human ACTB primer (for RT control)                                                 |
| OMPBaseGIndex2  | AATGATACGGGACCACCGAGATCTACAC[index2]ACACTCTTCCCTACACGACGCTCTCCGATCTACGCGTCAATTTACGCAGACTATCTTT  | Standard desalt | For use with piggyBac SRTs with indexes for Novaseq sequencing                     |
| OMPBaseAIndex2  | AATGATACGGGACCACCGAGATCTACAC[index2]ACACTCTTCCCTACACGACGCTCTCCGATCTCTACGTCAAATTTACGCAGACTATCTTT | Standard desalt |                                                                                    |
| N7 index1 prime | CAAGCAGAAGACGGCATACGAGAT[index1]GTCTCGTGGGCTCGG                                                 | Standard desalt | Unique index1 identifies each bulk RNA calling card library for Novaseq sequencing |

Table 8: Summary of bulk calling cards RNA seq experiments

| Cell line | Construct                      | Replicates |
|-----------|--------------------------------|------------|
| K562      | HyPBase(pRM 1011)              | 10         |
| K562      | HyPBase_centrip(pRM 1114)      | 10         |
| K562      | Barcoded PB_SRT_Puro(pRM 1892) |            |

## 4.7 Recommended model/parameters settings for peaks calling or differential peaks analysis

Table 9: Recommended model/parameters settings for peaks calling of different situations

| SITUATION                                         | METHOD   | SETTINGS                                                                                                                                                    |
|---------------------------------------------------|----------|-------------------------------------------------------------------------------------------------------------------------------------------------------------|
| Single-cell calling cards data without background | CCcaller | maxbetween = 1000-2000; pvalue_adj_cutoff = 0.001-0.05; lam_win_size = 1000000; pseudocounts = 0.1-1*.                                                      |
| Single-cell calling cards data with background    | MACCs    | window_size = 1000-2000; step_size = 500-800; pvalue_cutoffTTAA = 0.001-0.05; pvalue_cutoffbg = 0.1; lam_win_size = 1000000; pseudocounts = 0.1-1*.         |
| Bulk calling cards data without background        | CCcaller | maxbetween = 800-1200; pvalue_adj_cutoff = 0.0001-0.01; lam_win_size = 1000000; pseudocounts = 0.1-20*.                                                     |
| Bulk calling cards data with background           | MACCs    | window_size = 1000-1200; step_size = 500-800; pvalue_cutoffTTAA = 0.0001-0.01; pvalue_cutoffbg = 0.001-0.1; lam_win_size = 1000000; pseudocounts = 0.1-20*. |
| Yeast calling cards data                          | MACCs    | window_size = 100-200; step_size = 30-80; pvalue_cutoff = 0.0001-0.01; lam_win_size = 1000000; pseudocounts = 1*.                                           |

\*The setting of pseudocounts is largely influenced by library size. Normally, it can be adjusted to  $10^{-6} - 10^{-5} \times$  the number of insertions.

In general, we recommend using CCcaller for calling Brd4 (undirected) peaks or for calling TF peaks when no background is available or when the TF strongly redirects the HyPBase and no background is needed. We recommend MACCs for calling TF peaks when there is a Brd4 background available. For differential analysis, the Fisher exact test is the primary method for calling differentially bound peaks while the binomial test is primarily included as an alternative method and for backward compatibility with previous peak calling methods.

## References

- Andrilenas, K. K., Ramlall, V., Kurland, J., Leung, B., Harbaugh, A. G., & Siggers, T. (2018). Dna-binding landscape of irf3, irf5 and irf7 dimers: implications for dimer-specific gene regulation. *Nucleic acids research*, *46*(5), 2509–2520.
- Beisel, C., Jordan-Paiz, A., Köllmann, S., Ahrenstorf, A. E., Padoan, B., Barkhausen, T., ... Altfeld, M. (2023). Sex differences in the percentage of irf5 positive b cells are associated with higher production of tnf- $\alpha$  in women in response to tlr9 in humans. *Biology of Sex Differences*, *14*(1), 11.
- Bredikhin, D., Kats, I., & Stegle, O. (2022). Muon: multimodal omics analysis framework. *Genome Biology*, *23*(1), 1–12.
- Consortium, E. P., et al. (2012). An integrated encyclopedia of dna elements in the human genome. *Nature*, *489*(7414), 57.
- Dong, X., Hu, X., Bao, Y., Li, G., Yang, X.-d., Slauch, J. M., & Chen, L.-F. (2021). Brd4 regulates nlr4 inflammasome activation by facilitating irf8-mediated transcription of naips. *Journal of Cell Biology*, *220*(3).
- Fatima, M., Zhang, X., Lin, J., Zhou, P., Zhou, D., & Ming, R. (2020). Expression profiling of mads-box gene family revealed its role in vegetative development and stem ripening in *s. spontaneum*. *Scientific reports*, *10*(1), 20536.
- Gogol-Döring, A., Ammar, I., Gupta, S., Bunse, M., Miskey, C., Chen, W., ... Ivics, Z. (2016). Genome-wide profiling reveals remarkable parallels between insertion site selection properties of the mlv retrovirus and the piggybac transposon in primary human cd4+ t cells. *Molecular Therapy*, *24*(3), 592–606.
- Grant, O. A., Wang, Y., Kumari, M., Zabet, N. R., & Schalkwyk, L. (2022). Characterising sex differences of autosomal dna methylation in whole blood using the illumina epic array. *Clinical epigenetics*, *14*(1), 62.
- Griesbeck, M., Ziegler, S., Laffont, S., Smith, N., Chauveau, L., Tomezsko, P., ... others (2015). Sex differences in plasmacytoid dendritic cell levels of irf5 drive higher ifn- $\alpha$  production in women. *The Journal of Immunology*, *195*(11), 5327–5336.
- Hackett, S. R., Baltz, E. A., Coram, M., Wranik, B. J., Kim, G., Baker, A., ... McIsaac, R. S. (2020). Learning causal networks using inducible transcription factors and transcriptome-wide time series. *Molecular systems biology*, *16*(3), e9174.
- Heinz, S., Benner, C., Spann, N., Bertolino, E., Lin, Y. C., Laslo, P., ... Glass, C. K. (2010). Simple combinations of lineage-determining transcription factors prime cis-regulatory elements required for macrophage and b cell identities. *Molecular cell*, *38*(4), 576–589.
- Kemmeren, P., Sameith, K., Van De Pasch, L. A., Benschop, J. J., Lenstra, T. L., Margaritis, T., ... others (2014). Large-scale genetic perturbations reveal regulatory networks and an abundance of gene-specific repressors. *Cell*, *157*(3), 740–752.
- Kent, W. J., Zweig, A. S., Barber, G., Hinrichs, A. S., & Karolchik, D. (2010). Bigwig and bigbed: enabling browsing of large distributed datasets. *Bioinformatics*, *26*(17), 2204–2207.
- Kfoury, N., Qi, Z., Prager, B. C., Wilkinson, M. N., Broestl, L., Berrett, K. C., ... others (2021). Brd4-bound enhancers drive cell-intrinsic sex differences in glioblastoma. *Proceedings of the National Academy of Sciences*, *118*(16), e2017148118.
- Li, D., Hsu, S., Purushotham, D., Sears, R. L., & Wang, T. (2019). Washu epigenome browser update 2019. *Nucleic acids research*, *47*(W1), W158–W165.
- Li, D., Purushotham, D., Harrison, J. K., Hsu, S., Zhuo, X., Fan, C., ... others (2022). Washu epigenome browser update 2022. *Nucleic acids research*, *50*(W1), W774–W781.
- McLachlan, G. J., & Krishnan, T. (2007). *The em algorithm and extensions*. John Wiley & Sons.
- Moudgil, A., Li, D., Hsu, S., Purushotham, D., Wang, T., & Mitra, R. D. (2021). The qbcd track: a novel genome browser visualization for point processes. *Bioinformatics*, *37*(8), 1168–1170.
- Moudgil, A., Wilkinson, M. N., Chen, X., He, J., Cammack, A. J., Vasek, M. J., ... others (2020). Self-reporting transposons enable simultaneous readout of gene expression and transcription factor binding in single cells. *Cell*, *182*(4), 992–1008.
- Okada, Y., Nobori, H., Shimizu, M., Watanabe, M., Yonekura, M., Nakai, T., ... others (2011). Multiple ets family proteins regulate pf4 gene expression by binding to the same ets binding site. *PloS one*, *6*(9), e24837.
- Quinlan, A. R., & Hall, I. M. (2010). Bedtools: a flexible suite of utilities for comparing genomic features. *Bioinformatics*, *26*(6), 841–842.



- Shively, C. A., Liu, J., Chen, X., Loell, K., & Mitra, R. D. (2019). Homotypic cooperativity and collective binding are determinants of bhlh specificity and function. *Proceedings of the National Academy of Sciences*, *116*(32), 16143–16152.
- Thissen, D., Steinberg, L., & Kuang, D. (2002). Quick and easy implementation of the benjamini-hochberg procedure for controlling the false positive rate in multiple comparisons. *Journal of educational and behavioral statistics*, *27*(1), 77–83.
- Weiss, M. A. (2005). Molecular mechanisms of male sex determination: the enigma of sry. *DNA Conformation and Transcription*, 1–15.
- Wolf, F. A., Angerer, P., & Theis, F. J. (2018). Scanpy: large-scale single-cell gene expression data analysis. *Genome biology*, *19*(1), 1–5.
- Zhang, J., Lee, D., Dhiman, V., Jiang, P., Xu, J., McGillivray, P., ... others (2020). An integrative encode resource for cancer genomics. *Nature communications*, *11*(1), 3696.
- Zhang, J., Liu, J., Lee, D., Lou, S., Chen, Z., Gürsoy, G., & Gerstein, M. (2020). Diner: a differential graphical model for analysis of co-regulation network rewiring. *BMC bioinformatics*, *21*(1), 1–15.
- Zhang, X., Wang, X., Pan, L., Guo, W., Li, Y., & Wang, W. (2023). Genome-wide identification and expression analysis of mads-box transcription factors reveal their involvement in sex determination of hardy rubber tree (*eucommia ulmoides oliv.*). *Frontiers in Genetics*, *14*, 1138703.
- Zhang, Y., Liu, T., Meyer, C. A., Eeckhoute, J., Johnson, D. S., Bernstein, B. E., ... others (2008). Model-based analysis of chip-seq (macs). *Genome biology*, *9*(9), 1–9.
